# Supplementary material for: Do Double-Hybrid Functionals Benefit from Regularization in the PT2 Term? Observations from an Extensive Benchmark
Source: PubMed Central journal article supplement (PMC9036584; doi:10.1021/acs.jpclett.2c00718), 2022-04-13
Supplement: jz2c00718_si_001.pdf [file jz2c00718_si_001.pdf]

Supporting Information for:

Do Double Hybrid Functionals Benefit from Regularization in the PT2  
Term? Observations from an Extensive Benchmark

Golokesh Santra and Jan M.L. Martin\*

Department of Molecular Chemistry and Materials Science, Weizmann Institute of Science,

7610001 Rehovot, Israel.

Email: [gershom@weizmann.ac.il](mailto:gershom@weizmann.ac.il)

**Table S1:** Optimized parameters, total WTMA2 and its decomposition into major subcategories for  $\kappa$ DSD-PBEP86-D3BJ,  $\kappa$ DSD-PBEPBE-D3BJ,  $\kappa$ DSD-BLYP-D3BJ, and  $\kappa$ xDSD<sub>75</sub>-PBEP86-D3BJ. Heatmapping is from red (worst) via yellow to green (best). Thermo=Small Molecule Thermochemistry; Barrier=barrier heights; Large=reaction energies for large systems; Conf=conformer/intramolecular interactions; Intermol=intermolecular interactions; and NCI= Total Non-Covalent Interaction (Conformer/Intramolecular + Intermolecular).

| Functionals                                                     | WTMA2      | Parameters <sup>[a]</sup> |                  |                  |                |          | $\Delta$ WTMA2 (kcal/mol) |         |       |       |          |       |
|-----------------------------------------------------------------|------------|---------------------------|------------------|------------------|----------------|----------|---------------------------|---------|-------|-------|----------|-------|
|                                                                 | (kcal/mol) | C <sub>C,DFT</sub>        | C <sub>2ab</sub> | C <sub>2ss</sub> | S <sub>6</sub> | $\kappa$ | Thermo                    | Barrier | Large | Conf  | Intermol | NCI   |
| $\kappa$ DSD-PBEP86-D3BJ<br>( $c_{X,HF}=0.69$ )                 | 3.404      | 0.1713                    | 0.8220           | 0.3588           | 0.5073         | 1.1      | 1.021                     | 0.557   | 0.683 | 0.617 | 0.527    | 1.144 |
|                                                                 | 2.807      | 0.2339                    | 0.7410           | 0.2935           | 0.4331         | 1.45     | 0.842                     | 0.386   | 0.576 | 0.555 | 0.449    | 1.004 |
|                                                                 | 2.477      | 0.3176                    | 0.6534           | 0.2193           | 0.3953         | 2.0      | 0.665                     | 0.301   | 0.520 | 0.508 | 0.482    | 0.990 |
|                                                                 | 2.428      | 0.3397                    | 0.6336           | 0.2003           | 0.3950         | 2.2      | 0.628                     | 0.291   | 0.512 | 0.498 | 0.500    | 0.998 |
|                                                                 | 2.383      | 0.3647                    | 0.6148           | 0.1740           | 0.3960         | 2.5      | 0.589                     | 0.281   | 0.507 | 0.486 | 0.519    | 1.006 |
|                                                                 | 2.352      | 0.3906                    | 0.5974           | 0.1474           | 0.3989         | 3.0      | 0.554                     | 0.277   | 0.505 | 0.474 | 0.542    | 1.016 |
|                                                                 | 2.346      | 0.4075                    | 0.5864           | 0.1220           | 0.4111         | 3.5      | 0.543                     | 0.270   | 0.513 | 0.469 | 0.552    | 1.021 |
|                                                                 | 2.348      | 0.4164                    | 0.5824           | 0.1085           | 0.4175         | 4.0      | 0.534                     | 0.269   | 0.519 | 0.466 | 0.560    | 1.026 |
|                                                                 | 2.367      | 0.4312                    | 0.5761           | 0.0816           | 0.4339         | $\infty$ | 0.521                     | 0.268   | 0.552 | 0.457 | 0.569    | 1.026 |
| $\kappa$ DSD-PBEPBE-D3BJ<br>( $c_{X,HF}=0.68$ )                 | 3.467      | 0.1708                    | 0.8221           | 0.3865           | 0.5489         | 1.1      | 1.070                     | 0.544   | 0.693 | 0.644 | 0.516    | 1.160 |
|                                                                 | 2.996      | 0.2431                    | 0.7297           | 0.3071           | 0.5075         | 1.45     | 0.906                     | 0.409   | 0.599 | 0.619 | 0.463    | 1.082 |
|                                                                 | 2.760      | 0.3305                    | 0.6601           | 0.2026           | 0.5136         | 2.0      | 0.755                     | 0.342   | 0.535 | 0.620 | 0.508    | 1.127 |
|                                                                 | 2.722      | 0.3506                    | 0.6391           | 0.1983           | 0.5037         | 2.2      | 0.726                     | 0.337   | 0.522 | 0.612 | 0.526    | 1.137 |
|                                                                 | 2.686      | 0.3760                    | 0.6182           | 0.1790           | 0.5061         | 2.5      | 0.693                     | 0.329   | 0.511 | 0.608 | 0.546    | 1.154 |
|                                                                 | 2.659      | 0.4068                    | 0.6076           | 0.1376           | 0.5206         | 3.0      | 0.658                     | 0.320   | 0.507 | 0.606 | 0.568    | 1.174 |
|                                                                 | 2.650      | 0.4239                    | 0.5985           | 0.1161           | 0.5347         | 3.5      | 0.644                     | 0.314   | 0.506 | 0.607 | 0.578    | 1.185 |
|                                                                 | 2.648      | 0.4293                    | 0.5933           | 0.1095           | 0.5394         | 4.0      | 0.636                     | 0.313   | 0.507 | 0.608 | 0.583    | 1.191 |
|                                                                 | 2.668      | 0.4518                    | 0.5893           | 0.0661           | 0.5739         | $\infty$ | 0.640                     | 0.299   | 0.532 | 0.610 | 0.586    | 1.197 |
| $\kappa$ DSD-BLYP-D3BJ<br>( $c_{X,HF}=0.71$ )                   | 3.670      | 0.2647                    | 0.8008           | 0.3807           | 0.6462         | 1.1      | 0.977                     | 0.607   | 0.697 | 0.642 | 0.746    | 1.389 |
|                                                                 | 2.978      | 0.3479                    | 0.7033           | 0.3226           | 0.5770         | 1.45     | 0.789                     | 0.425   | 0.543 | 0.564 | 0.657    | 1.221 |
|                                                                 | 2.494      | 0.4197                    | 0.6303           | 0.2878           | 0.5245         | 2.0      | 0.640                     | 0.309   | 0.434 | 0.513 | 0.598    | 1.111 |
|                                                                 | 2.418      | 0.4387                    | 0.6166           | 0.2724           | 0.5236         | 2.2      | 0.612                     | 0.292   | 0.426 | 0.506 | 0.583    | 1.089 |
|                                                                 | 2.370      | 0.4621                    | 0.5905           | 0.2728           | 0.5094         | 2.5      | 0.584                     | 0.279   | 0.434 | 0.493 | 0.579    | 1.072 |
|                                                                 | 2.355      | 0.4900                    | 0.5714           | 0.2478           | 0.5181         | 3.0      | 0.566                     | 0.274   | 0.464 | 0.483 | 0.568    | 1.051 |
|                                                                 | 2.364      | 0.5092                    | 0.5585           | 0.2327           | 0.5219         | 3.5      | 0.556                     | 0.275   | 0.493 | 0.474 | 0.566    | 1.040 |
|                                                                 | 2.377      | 0.5168                    | 0.5551           | 0.2196           | 0.5279         | 4.0      | 0.556                     | 0.274   | 0.518 | 0.468 | 0.561    | 1.030 |
|                                                                 | 2.430      | 0.5342                    | 0.5467           | 0.1924           | 0.5489         | $\infty$ | 0.556                     | 0.275   | 0.575 | 0.468 | 0.556    | 1.024 |
| $\kappa$ xDSD <sub>75</sub> -PBEP86-D3BJ<br>( $c_{X,HF}=0.75$ ) | 3.781      | 0.1118                    | 0.9307           | 0.3960           | 0.4170         | 1.1      | 1.062                     | 0.690   | 0.725 | 0.663 | 0.641    | 1.303 |
|                                                                 | 3.011      | 0.1774                    | 0.8383           | 0.3231           | 0.3412         | 1.45     | 0.864                     | 0.467   | 0.593 | 0.570 | 0.518    | 1.088 |
|                                                                 | 2.459      | 0.2553                    | 0.7557           | 0.2471           | 0.3112         | 2.0      | 0.680                     | 0.327   | 0.487 | 0.516 | 0.449    | 0.965 |
|                                                                 | 2.358      | 0.2709                    | 0.7405           | 0.2319           | 0.3067         | 2.2      | 0.642                     | 0.303   | 0.465 | 0.506 | 0.442    | 0.948 |
|                                                                 | 2.261      | 0.2878                    | 0.7201           | 0.2253           | 0.2932         | 2.5      | 0.601                     | 0.284   | 0.442 | 0.491 | 0.442    | 0.933 |
|                                                                 | 2.178      | 0.3151                    | 0.7066           | 0.1905           | 0.2922         | 3.0      | 0.552                     | 0.265   | 0.438 | 0.470 | 0.453    | 0.923 |
|                                                                 | 2.146      | 0.3328                    | 0.6929           | 0.1738           | 0.2913         | 3.5      | 0.525                     | 0.256   | 0.446 | 0.453 | 0.466    | 0.919 |
|                                                                 | 2.135      | 0.3382                    | 0.6850           | 0.1772           | 0.2829         | 4.0      | 0.510                     | 0.257   | 0.450 | 0.446 | 0.472    | 0.918 |
|                                                                 | 2.145      | 0.3590                    | 0.6777           | 0.1389           | 0.3071         | $\infty$ | 0.494                     | 0.250   | 0.487 | 0.432 | 0.481    | 0.914 |

<sup>[a]</sup>All results are with fixed  $a_1 = 0$ ;  $s_8 = 0$ ; and  $a_2 = 5.5$  (for  $\kappa$ DSD-PBEP86-D3BJ and  $\kappa$ DSD-PBEPBE-D3BJ), 5.2 (for  $\kappa$ DSD-BLYP-D3BJ), and 5.6 (for  $\kappa$ xDSD<sub>75</sub>-PBEP86-D3BJ).

**Table S2:** Optimized parameters, total WTMAP2 and its decomposition into major subcategories for  $\kappa$ DSD-PBEP86-D4,  $\kappa$ DSD-PBEPBE-D4,  $\kappa$ DSD-BLYP-D4, and  $\kappa$ DSD<sub>75</sub>-PBEP86-D4. Heatmapping is from red (worst) via yellow to green (best). Thermo=Small Molecule Thermochemistry; Barrier=barrier heights; Large=reaction energies for large systems; Conf=conformer/intramolecular interactions; Intermol=intermolecular interactions; and NCI= Total Non-Covalent Interaction (Conformer/Intramolecular + Intermolecular).

| Functionals                                                  | WTMAP2 (kcal/mol) | Parameters <sup>[a]</sup> |           |           |        |        |       |          | $\Delta$ WTMAP2 (kcal/mol) |         |       |       |          |       |
|--------------------------------------------------------------|-------------------|---------------------------|-----------|-----------|--------|--------|-------|----------|----------------------------|---------|-------|-------|----------|-------|
|                                                              |                   | $c_{c,DFT}$               | $c_{2ab}$ | $c_{2ss}$ | $s_6$  | $a_1$  | $a_2$ | $\kappa$ | Thermo                     | Barrier | Large | Conf  | Intermol | NCI   |
| $\kappa$ DSD-PBEP86-D4<br>( $c_{X,HF}=0.69$ )                | 3.431             | 0.1687                    | 0.8473    | 0.3131    | 0.6038 | 0.012  | 5.751 | 1.1      | 1.008                      | 0.560   | 0.693 | 0.588 | 0.581    | 1.169 |
|                                                              | 2.796             | 0.2270                    | 0.7527    | 0.2577    | 0.5507 | 0.158  | 5.000 | 1.45     | 0.847                      | 0.387   | 0.581 | 0.494 | 0.487    | 0.980 |
|                                                              | 2.410             | 0.2919                    | 0.6841    | 0.1822    | 0.5461 | 0.262  | 4.461 | 2        | 0.700                      | 0.303   | 0.508 | 0.447 | 0.452    | 0.899 |
|                                                              | 2.349             | 0.3153                    | 0.6629    | 0.1645    | 0.5469 | 0.282  | 4.394 | 2.2      | 0.663                      | 0.289   | 0.505 | 0.439 | 0.453    | 0.892 |
|                                                              | 2.294             | 0.3440                    | 0.6400    | 0.1444    | 0.5458 | 0.312  | 4.327 | 2.5      | 0.624                      | 0.279   | 0.507 | 0.432 | 0.453    | 0.885 |
|                                                              | 2.252             | 0.3719                    | 0.6229    | 0.1170    | 0.5483 | 0.360  | 4.096 | 3        | 0.588                      | 0.275   | 0.512 | 0.418 | 0.459    | 0.877 |
|                                                              | 2.239             | 0.3882                    | 0.6130    | 0.0995    | 0.5558 | 0.369  | 4.103 | 3.5      | 0.572                      | 0.272   | 0.521 | 0.414 | 0.460    | 0.874 |
|                                                              | 2.233             | 0.4012                    | 0.6069    | 0.0816    | 0.5657 | 0.375  | 4.099 | 4        | 0.564                      | 0.267   | 0.532 | 0.410 | 0.462    | 0.871 |
|                                                              | 2.248             | 0.4224                    | 0.5935    | 0.0566    | 0.5917 | 0.371  | 4.201 | $\infty$ | 0.545                      | 0.260   | 0.573 | 0.406 | 0.463    | 0.869 |
| $\kappa$ DSD-PBEPBE-D4<br>( $c_{X,HF}=0.68$ )                | 3.472             | 0.1540                    | 0.8696    | 0.3069    | 0.6543 | 0.052  | 5.351 | 1.1      | 1.060                      | 0.544   | 0.717 | 0.562 | 0.589    | 1.151 |
|                                                              | 2.924             | 0.2309                    | 0.7709    | 0.2302    | 0.6350 | 0.180  | 4.752 | 1.45     | 0.904                      | 0.407   | 0.620 | 0.492 | 0.502    | 0.994 |
|                                                              | 2.580             | 0.3246                    | 0.6785    | 0.1603    | 0.6421 | 0.304  | 4.108 | 2        | 0.761                      | 0.341   | 0.555 | 0.447 | 0.475    | 0.922 |
|                                                              | 2.521             | 0.3456                    | 0.6604    | 0.1425    | 0.6501 | 0.311  | 4.089 | 2.2      | 0.732                      | 0.331   | 0.540 | 0.444 | 0.474    | 0.918 |
|                                                              | 2.462             | 0.3607                    | 0.6437    | 0.1296    | 0.6568 | 0.350  | 3.849 | 2.5      | 0.708                      | 0.327   | 0.519 | 0.432 | 0.476    | 0.908 |
|                                                              | 2.400             | 0.3955                    | 0.6257    | 0.0953    | 0.6706 | 0.353  | 3.883 | 3        | 0.669                      | 0.315   | 0.508 | 0.425 | 0.483    | 0.908 |
|                                                              | 2.369             | 0.4108                    | 0.6181    | 0.0769    | 0.6852 | 0.359  | 3.796 | 3.5      | 0.651                      | 0.312   | 0.499 | 0.423 | 0.485    | 0.908 |
|                                                              | 2.354             | 0.4184                    | 0.6169    | 0.0608    | 0.6997 | 0.381  | 3.745 | 4        | 0.643                      | 0.310   | 0.501 | 0.419 | 0.481    | 0.900 |
|                                                              | 2.363             | 0.4371                    | 0.6111    | 0.0318    | 0.7226 | 0.384  | 3.756 | $\infty$ | 0.635                      | 0.301   | 0.523 | 0.420 | 0.484    | 0.904 |
| $\kappa$ DSD-BLYP-D4<br>( $c_{X,HF}=0.71$ )                  | 3.745             | 0.2819                    | 0.8015    | 0.3617    | 0.7394 | -0.015 | 5.689 | 1.1      | 0.957                      | 0.609   | 0.743 | 0.626 | 0.810    | 1.436 |
|                                                              | 3.027             | 0.3480                    | 0.7151    | 0.3112    | 0.6836 | 0.020  | 5.577 | 1.45     | 0.776                      | 0.425   | 0.574 | 0.549 | 0.702    | 1.251 |
|                                                              | 2.512             | 0.4207                    | 0.6480    | 0.2549    | 0.6576 | 0.072  | 5.335 | 2        | 0.633                      | 0.315   | 0.450 | 0.499 | 0.615    | 1.114 |
|                                                              | 2.430             | 0.4426                    | 0.6250    | 0.2527    | 0.6486 | 0.095  | 5.227 | 2.2      | 0.601                      | 0.300   | 0.437 | 0.490 | 0.603    | 1.092 |
|                                                              | 2.370             | 0.4671                    | 0.5978    | 0.2541    | 0.6379 | 0.112  | 5.163 | 2.5      | 0.573                      | 0.286   | 0.435 | 0.483 | 0.592    | 1.075 |
|                                                              | 2.352             | 0.4823                    | 0.5821    | 0.2372    | 0.6484 | 0.213  | 4.539 | 3        | 0.557                      | 0.287   | 0.448 | 0.468 | 0.592    | 1.060 |
|                                                              | 2.351             | 0.5078                    | 0.5654    | 0.2204    | 0.6528 | 0.157  | 4.897 | 3.5      | 0.544                      | 0.282   | 0.475 | 0.466 | 0.584    | 1.050 |
|                                                              | 2.365             | 0.5135                    | 0.5608    | 0.2145    | 0.6567 | 0.147  | 4.950 | 4        | 0.541                      | 0.281   | 0.496 | 0.464 | 0.583    | 1.047 |
|                                                              | 2.428             | 0.5231                    | 0.5578    | 0.1891    | 0.6808 | 0.156  | 4.878 | $\infty$ | 0.545                      | 0.282   | 0.554 | 0.468 | 0.579    | 1.047 |
| $\kappa$ DSD <sub>75</sub> -PBEP86-D4<br>( $c_{X,HF}=0.75$ ) | 3.768             | 0.1191                    | 0.9210    | 0.4375    | 0.5258 | -0.337 | 8.486 | 1.1      | 1.042                      | 0.689   | 0.735 | 0.696 | 0.607    | 1.302 |
|                                                              | 2.997             | 0.1799                    | 0.8374    | 0.3464    | 0.4116 | -0.335 | 8.236 | 1.45     | 0.848                      | 0.467   | 0.597 | 0.567 | 0.519    | 1.085 |
|                                                              | 2.456             | 0.2403                    | 0.7745    | 0.2404    | 0.3934 | 0.072  | 5.702 | 2        | 0.698                      | 0.330   | 0.484 | 0.479 | 0.465    | 0.944 |
|                                                              | 2.354             | 0.2600                    | 0.7572    | 0.2241    | 0.3910 | 0.095  | 5.623 | 2.2      | 0.658                      | 0.307   | 0.464 | 0.468 | 0.457    | 0.925 |
|                                                              | 2.252             | 0.2864                    | 0.7340    | 0.2013    | 0.3944 | 0.114  | 5.592 | 2.5      | 0.609                      | 0.286   | 0.450 | 0.454 | 0.453    | 0.907 |
|                                                              | 2.177             | 0.3013                    | 0.7203    | 0.1816    | 0.3985 | 0.331  | 4.212 | 3        | 0.573                      | 0.273   | 0.434 | 0.429 | 0.468    | 0.897 |
|                                                              | 2.126             | 0.3220                    | 0.7069    | 0.1637    | 0.4057 | 0.190  | 5.193 | 3.5      | 0.544                      | 0.259   | 0.441 | 0.430 | 0.452    | 0.882 |
|                                                              | 2.112             | 0.3348                    | 0.6972    | 0.1518    | 0.4114 | 0.191  | 5.203 | 4        | 0.529                      | 0.254   | 0.449 | 0.423 | 0.457    | 0.880 |
|                                                              | 2.118             | 0.3517                    | 0.6623    | 0.1168    | 0.4246 | 0.283  | 4.720 | $\infty$ | 0.508                      | 0.252   | 0.493 | 0.409 | 0.457    | 0.866 |

<sup>[a]</sup>All results are with fixed  $c_{ATM} = 1$  and  $s_8 = 0$ .

**Table S3:** Optimized parameters, total WTMAP2 and its decomposition into major subcategories for  $\kappa$ DOD-PBEP86-D4,  $\kappa$ DOD-PBEPBE-D4,  $\kappa$ DOD-BLYP-D4, and  $\kappa$ xDOD<sub>75</sub>-PBEP86-D4. Heatmapping is from red (worst) via yellow to green (best). Thermo=Small Molecule Thermochemistry; Barrier=barrier heights; Large=reaction energies for large systems; Conf=conformer/intramolecular interactions; Intermol=intermolecular interactions; and NCI= Total Non-Covalent Interaction (Conformer/Intramolecular + Intermolecular).

| Functionals                                                         | WTMAP2<br>(kcal/mol) | Parameters <sup>[a]</sup> |                  |                  |                |                |                |          | $\Delta$ WTMAP2 (kcal/mol) |         |       |       |          |       |
|---------------------------------------------------------------------|----------------------|---------------------------|------------------|------------------|----------------|----------------|----------------|----------|----------------------------|---------|-------|-------|----------|-------|
|                                                                     |                      | C <sub>C,DFT</sub>        | C <sub>2ab</sub> | C <sub>2ss</sub> | S <sub>6</sub> | a <sub>1</sub> | a <sub>2</sub> | $\kappa$ | Thermo                     | Barrier | Large | Conf  | Intermol | NCI   |
| $\kappa$ DOD-PBEP86-D4<br>(C <sub>X,HF</sub> =0.69)                 | 3.632                | 0.2174                    | 0.9390           | 0.0              | 0.7101         | 0.001          | 5.570          | 1.1      | 1.002                      | 0.655   | 0.777 | 0.572 | 0.627    | 1.199 |
|                                                                     | 3.004                | 0.2653                    | 0.8332           | 0.0              | 0.6707         | 0.124          | 4.927          | 1.45     | 0.856                      | 0.442   | 0.676 | 0.495 | 0.536    | 1.031 |
|                                                                     | 2.585                | 0.3200                    | 0.7413           | 0.0              | 0.6408         | 0.247          | 4.403          | 2        | 0.738                      | 0.318   | 0.602 | 0.455 | 0.473    | 0.927 |
|                                                                     | 2.501                | 0.3363                    | 0.7187           | 0.0              | 0.6350         | 0.264          | 4.345          | 2.2      | 0.710                      | 0.300   | 0.580 | 0.444 | 0.468    | 0.911 |
|                                                                     | 2.419                | 0.3604                    | 0.6921           | 0.0              | 0.6251         | 0.293          | 4.225          | 2.5      | 0.677                      | 0.285   | 0.560 | 0.428 | 0.470    | 0.898 |
|                                                                     | 2.336                | 0.3892                    | 0.6638           | 0.0              | 0.6043         | 0.320          | 4.194          | 3        | 0.639                      | 0.271   | 0.550 | 0.411 | 0.465    | 0.876 |
|                                                                     | 2.297                | 0.4013                    | 0.6456           | 0.0              | 0.6076         | 0.352          | 4.033          | 3.5      | 0.618                      | 0.267   | 0.544 | 0.402 | 0.467    | 0.869 |
|                                                                     | 2.280                | 0.4093                    | 0.6341           | 0.0              | 0.6139         | 0.357          | 4.024          | 4        | 0.604                      | 0.264   | 0.543 | 0.400 | 0.469    | 0.869 |
|                                                                     | 2.271                | 0.4301                    | 0.6131           | 0.0              | 0.6158         | 0.344          | 4.243          | $\infty$ | 0.575                      | 0.253   | 0.581 | 0.399 | 0.464    | 0.862 |
| $\kappa$ DOD-PBEPBE-D4<br>(C <sub>X,HF</sub> =0.68)                 | 3.664                | 0.2310                    | 0.9378           | 0.0              | 0.7777         | 0.045          | 5.323          | 1.1      | 1.032                      | 0.644   | 0.793 | 0.578 | 0.617    | 1.195 |
|                                                                     | 3.084                | 0.2885                    | 0.8294           | 0.0              | 0.7367         | 0.180          | 4.596          | 1.45     | 0.898                      | 0.441   | 0.703 | 0.503 | 0.540    | 1.043 |
|                                                                     | 2.697                | 0.3553                    | 0.7302           | 0.0              | 0.7255         | 0.296          | 4.039          | 2        | 0.778                      | 0.341   | 0.618 | 0.466 | 0.495    | 0.961 |
|                                                                     | 2.616                | 0.3682                    | 0.7134           | 0.0              | 0.7218         | 0.309          | 3.990          | 2.2      | 0.752                      | 0.322   | 0.594 | 0.463 | 0.485    | 0.948 |
|                                                                     | 2.528                | 0.3868                    | 0.6886           | 0.0              | 0.7231         | 0.344          | 3.822          | 2.5      | 0.722                      | 0.306   | 0.569 | 0.450 | 0.481    | 0.931 |
|                                                                     | 2.441                | 0.4059                    | 0.6624           | 0.0              | 0.7263         | 0.347          | 3.921          | 3        | 0.690                      | 0.294   | 0.539 | 0.436 | 0.482    | 0.918 |
|                                                                     | 2.398                | 0.4179                    | 0.6463           | 0.0              | 0.7358         | 0.381          | 3.745          | 3.5      | 0.672                      | 0.289   | 0.519 | 0.437 | 0.481    | 0.918 |
|                                                                     | 2.375                | 0.4240                    | 0.6383           | 0.0              | 0.7380         | 0.397          | 3.592          | 4        | 0.662                      | 0.291   | 0.517 | 0.425 | 0.480    | 0.905 |
|                                                                     | 2.369                | 0.4465                    | 0.6175           | 0.0              | 0.7410         | 0.377          | 3.770          | $\infty$ | 0.641                      | 0.289   | 0.531 | 0.423 | 0.485    | 0.908 |
| $\kappa$ DOD-BLYP-D4<br>(C <sub>X,HF</sub> =0.71)                   | 3.996                | 0.3470                    | 0.9431           | 0.0              | 0.8170         | -0.013         | 5.545          | 1.1      | 1.058                      | 0.732   | 0.779 | 0.609 | 0.819    | 1.428 |
|                                                                     | 3.323                | 0.3884                    | 0.8559           | 0.0              | 0.7746         | 0.004          | 5.498          | 1.45     | 0.916                      | 0.521   | 0.631 | 0.549 | 0.707    | 1.255 |
|                                                                     | 2.846                | 0.4519                    | 0.7574           | 0.0              | 0.7557         | 0.067          | 5.144          | 2        | 0.794                      | 0.385   | 0.523 | 0.508 | 0.635    | 1.143 |
|                                                                     | 2.751                | 0.4643                    | 0.7379           | 0.0              | 0.7556         | 0.085          | 5.029          | 2.2      | 0.768                      | 0.360   | 0.501 | 0.500 | 0.623    | 1.123 |
|                                                                     | 2.667                | 0.4801                    | 0.7203           | 0.0              | 0.7512         | 0.100          | 4.966          | 2.5      | 0.750                      | 0.336   | 0.483 | 0.495 | 0.604    | 1.099 |
|                                                                     | 2.615                | 0.5029                    | 0.6866           | 0.0              | 0.7592         | 0.133          | 4.777          | 3        | 0.718                      | 0.321   | 0.490 | 0.484 | 0.601    | 1.085 |
|                                                                     | 2.606                | 0.5334                    | 0.6657           | 0.0              | 0.7469         | 0.107          | 4.996          | 3.5      | 0.708                      | 0.314   | 0.510 | 0.479 | 0.595    | 1.074 |
|                                                                     | 2.600                | 0.5442                    | 0.6501           | 0.0              | 0.7530         | 0.127          | 4.892          | 4        | 0.692                      | 0.311   | 0.527 | 0.477 | 0.593    | 1.070 |
|                                                                     | 2.622                | 0.5548                    | 0.6297           | 0.0              | 0.7661         | 0.146          | 4.779          | $\infty$ | 0.667                      | 0.301   | 0.576 | 0.480 | 0.598    | 1.078 |
| $\kappa$ xDOD <sub>75</sub> -PBEP86-D4<br>(C <sub>X,HF</sub> =0.75) | 4.055                | 0.1649                    | 1.0712           | 0.0              | 0.6211         | -0.090         | 6.100          | 1.1      | 1.072                      | 0.815   | 0.835 | 0.647 | 0.686    | 1.333 |
|                                                                     | 3.295                | 0.2213                    | 0.9558           | 0.0              | 0.5503         | -0.015         | 5.776          | 1.45     | 0.900                      | 0.575   | 0.702 | 0.543 | 0.576    | 1.119 |
|                                                                     | 2.721                | 0.2732                    | 0.8599           | 0.0              | 0.5136         | 0.010          | 5.625          | 2        | 0.753                      | 0.389   | 0.572 | 0.482 | 0.525    | 1.007 |
|                                                                     | 2.597                | 0.2776                    | 0.8399           | 0.0              | 0.5261         | 0.131          | 4.899          | 2.2      | 0.726                      | 0.345   | 0.544 | 0.470 | 0.512    | 0.982 |
|                                                                     | 2.476                | 0.2994                    | 0.8129           | 0.0              | 0.5133         | 0.144          | 4.917          | 2.5      | 0.691                      | 0.319   | 0.515 | 0.454 | 0.497    | 0.952 |
|                                                                     | 2.361                | 0.3175                    | 0.7862           | 0.0              | 0.5160         | 0.286          | 4.201          | 3        | 0.657                      | 0.288   | 0.497 | 0.437 | 0.482    | 0.919 |
|                                                                     | 2.284                | 0.3431                    | 0.7654           | 0.0              | 0.4943         | 0.138          | 5.143          | 3.5      | 0.624                      | 0.276   | 0.477 | 0.426 | 0.483    | 0.908 |
|                                                                     | 2.248                | 0.3538                    | 0.7555           | 0.0              | 0.4903         | 0.169          | 5.064          | 4        | 0.610                      | 0.267   | 0.480 | 0.419 | 0.473    | 0.892 |
|                                                                     | 2.215                | 0.3695                    | 0.7092           | 0.0              | 0.4865         | 0.199          | 4.952          | $\infty$ | 0.582                      | 0.251   | 0.507 | 0.402 | 0.473    | 0.875 |

<sup>[a]</sup>All results are with fixed c<sub>ATM</sub> = 1 and s<sub>8</sub> = 0.

**Table S4:** Optimized parameters, total WTAD2 and its decomposition into major subcategories for  $\kappa$ DSD<sub>X</sub>-PBEP86-D3BJ. Heatmapping is from red (worst) via yellow to green (best). Thermo=Small Molecule Thermochemistry; Barrier=barrier heights; Large=reaction energies for large systems; Conf=conformer/intramolecular interactions; Intermol=intermolecular interactions; and NCI= Total Non-Covalent Interaction (Conformer/Intramolecular + Intermolecular).

| WTAD2<br>(kcal/mol) | Parameters <sup>[a]</sup> |                    |                    |                  |                  |                |          | $\Delta$ WTAD2 (kcal/mol) |         |       |       |          |       |
|---------------------|---------------------------|--------------------|--------------------|------------------|------------------|----------------|----------|---------------------------|---------|-------|-------|----------|-------|
|                     | C <sub>X,HF</sub>         | C <sub>X,DFT</sub> | C <sub>C,DFT</sub> | C <sub>2ab</sub> | C <sub>2ss</sub> | S <sub>6</sub> | K        | Thermo                    | Barrier | Large | Conf  | Intermol | NCI   |
| 3.085               | 0.50                      | 0.50               | 0.3329             | 0.6187           | 0.0368           | 0.7936         | 1.1      | 0.943                     | 0.370   | 0.599 | 0.616 | 0.558    | 1.174 |
| 3.024               | 0.50                      | 0.50               | 0.4029             | 0.5240           | 0.0100           | 0.7458         | 1.45     | 0.864                     | 0.390   | 0.595 | 0.586 | 0.590    | 1.176 |
| 3.087               | 0.50                      | 0.50               | 0.4816             | 0.4590           | -0.0633          | 0.7483         | 2.0      | 0.825                     | 0.419   | 0.621 | 0.573 | 0.649    | 1.222 |
| 3.113               | 0.50                      | 0.50               | 0.5014             | 0.4402           | -0.0734          | 0.7499         | 2.2      | 0.817                     | 0.425   | 0.629 | 0.568 | 0.674    | 1.242 |
| 3.146               | 0.50                      | 0.50               | 0.5262             | 0.4156           | -0.0825          | 0.7485         | 2.5      | 0.806                     | 0.430   | 0.642 | 0.565 | 0.703    | 1.268 |
| 3.189               | 0.50                      | 0.50               | 0.5481             | 0.3941           | -0.0964          | 0.7596         | 3.0      | 0.805                     | 0.429   | 0.663 | 0.563 | 0.730    | 1.293 |
| 3.218               | 0.50                      | 0.50               | 0.5604             | 0.3818           | -0.1007          | 0.7608         | 3.5      | 0.802                     | 0.428   | 0.679 | 0.564 | 0.744    | 1.309 |
| 3.239               | 0.50                      | 0.50               | 0.5671             | 0.3753           | -0.1079          | 0.7673         | 4.0      | 0.806                     | 0.422   | 0.695 | 0.567 | 0.748    | 1.315 |
| 3.307               | 0.50                      | 0.50               | 0.5887             | 0.3581           | -0.1237          | 0.7774         | $\infty$ | 0.816                     | 0.409   | 0.739 | 0.572 | 0.772    | 1.344 |
| 2.978               | 0.55                      | 0.45               | 0.2843             | 0.6742           | 0.1262           | 0.7143         | 1.1      | 0.938                     | 0.367   | 0.571 | 0.597 | 0.505    | 1.102 |
| 2.795               | 0.55                      | 0.45               | 0.3536             | 0.5687           | 0.0998           | 0.6675         | 1.45     | 0.836                     | 0.334   | 0.540 | 0.561 | 0.524    | 1.085 |
| 2.790               | 0.55                      | 0.45               | 0.4322             | 0.5045           | 0.0169           | 0.6654         | 2.0      | 0.763                     | 0.356   | 0.549 | 0.539 | 0.583    | 1.122 |
| 2.807               | 0.55                      | 0.45               | 0.4554             | 0.4877           | -0.0026          | 0.6660         | 2.2      | 0.749                     | 0.361   | 0.557 | 0.532 | 0.608    | 1.139 |
| 2.831               | 0.55                      | 0.45               | 0.4799             | 0.4696           | -0.0234          | 0.6678         | 2.5      | 0.737                     | 0.365   | 0.570 | 0.527 | 0.633    | 1.160 |
| 2.863               | 0.55                      | 0.45               | 0.5063             | 0.4471           | -0.0423          | 0.6764         | 3.0      | 0.728                     | 0.365   | 0.585 | 0.521 | 0.664    | 1.185 |
| 2.888               | 0.55                      | 0.45               | 0.5233             | 0.4324           | -0.0505          | 0.6777         | 3.5      | 0.720                     | 0.365   | 0.599 | 0.519 | 0.685    | 1.204 |
| 2.905               | 0.55                      | 0.45               | 0.5340             | 0.4236           | -0.0593          | 0.6854         | 4.0      | 0.719                     | 0.361   | 0.609 | 0.518 | 0.699    | 1.216 |
| 2.962               | 0.55                      | 0.45               | 0.5554             | 0.4077           | -0.0799          | 0.6975         | $\infty$ | 0.724                     | 0.345   | 0.654 | 0.521 | 0.718    | 1.239 |
| 2.989               | 0.58                      | 0.42               | 0.2537             | 0.6938           | 0.2093           | 0.6625         | 1.1      | 0.953                     | 0.388   | 0.562 | 0.591 | 0.495    | 1.085 |
| 2.711               | 0.58                      | 0.42               | 0.3202             | 0.5965           | 0.1598           | 0.6102         | 1.45     | 0.831                     | 0.315   | 0.523 | 0.557 | 0.485    | 1.041 |
| 2.658               | 0.58                      | 0.42               | 0.4059             | 0.5330           | 0.0658           | 0.6041         | 2.0      | 0.727                     | 0.328   | 0.526 | 0.527 | 0.550    | 1.077 |
| 2.665               | 0.58                      | 0.42               | 0.4288             | 0.5163           | 0.0390           | 0.6123         | 2.2      | 0.714                     | 0.327   | 0.533 | 0.520 | 0.570    | 1.090 |
| 2.678               | 0.58                      | 0.42               | 0.4546             | 0.4969           | 0.0185           | 0.6149         | 2.5      | 0.696                     | 0.333   | 0.540 | 0.510 | 0.600    | 1.110 |
| 2.703               | 0.58                      | 0.42               | 0.4848             | 0.4744           | -0.0035          | 0.6184         | 3.0      | 0.680                     | 0.335   | 0.552 | 0.500 | 0.635    | 1.135 |
| 2.722               | 0.58                      | 0.42               | 0.5024             | 0.4615           | -0.0188          | 0.6251         | 3.5      | 0.674                     | 0.332   | 0.565 | 0.497 | 0.654    | 1.151 |
| 2.736               | 0.58                      | 0.42               | 0.5130             | 0.4524           | -0.0296          | 0.6346         | 4.0      | 0.674                     | 0.326   | 0.575 | 0.497 | 0.665    | 1.161 |
| 2.761               | 0.58                      | 0.42               | 0.5277             | 0.4438           | -0.0446          | 0.6411         | $\infty$ | 0.667                     | 0.307   | 0.614 | 0.495 | 0.679    | 1.173 |
| 3.116               | 0.63                      | 0.37               | 0.2117             | 0.7499           | 0.2922           | 0.5855         | 1.1      | 0.980                     | 0.447   | 0.593 | 0.597 | 0.499    | 1.096 |
| 2.672               | 0.63                      | 0.37               | 0.2820             | 0.6549           | 0.2282           | 0.5260         | 1.45     | 0.819                     | 0.327   | 0.526 | 0.546 | 0.454    | 1.001 |
| 2.506               | 0.63                      | 0.37               | 0.3638             | 0.5852           | 0.1344           | 0.5112         | 2.0      | 0.690                     | 0.287   | 0.506 | 0.517 | 0.505    | 1.023 |
| 2.490               | 0.63                      | 0.37               | 0.3878             | 0.5691           | 0.1113           | 0.5111         | 2.2      | 0.661                     | 0.288   | 0.506 | 0.506 | 0.528    | 1.033 |
| 2.484               | 0.63                      | 0.37               | 0.4092             | 0.5497           | 0.0877           | 0.5189         | 2.5      | 0.646                     | 0.284   | 0.510 | 0.499 | 0.545    | 1.044 |
| 2.488               | 0.63                      | 0.37               | 0.4395             | 0.5319           | 0.0543           | 0.5260         | 3.0      | 0.624                     | 0.283   | 0.522 | 0.486 | 0.572    | 1.058 |
| 2.494               | 0.63                      | 0.37               | 0.4593             | 0.5192           | 0.0335           | 0.5386         | 3.5      | 0.612                     | 0.280   | 0.530 | 0.478 | 0.594    | 1.072 |
| 2.501               | 0.63                      | 0.37               | 0.4678             | 0.5118           | 0.0226           | 0.5470         | 4.0      | 0.610                     | 0.275   | 0.540 | 0.477 | 0.601    | 1.078 |
| 2.544               | 0.63                      | 0.37               | 0.4892             | 0.5012           | -0.0043          | 0.5670         | $\infty$ | 0.601                     | 0.270   | 0.575 | 0.470 | 0.628    | 1.098 |
| 3.404               | 0.69                      | 0.31               | 0.1713             | 0.8220           | 0.3588           | 0.5073         | 1.1      | 1.021                     | 0.557   | 0.683 | 0.617 | 0.527    | 1.144 |
| 2.808               | 0.69                      | 0.31               | 0.2339             | 0.7410           | 0.2935           | 0.4331         | 1.45     | 0.842                     | 0.386   | 0.576 | 0.555 | 0.449    | 1.004 |
| 2.476               | 0.69                      | 0.31               | 0.3176             | 0.6534           | 0.2193           | 0.3953         | 2.0      | 0.665                     | 0.301   | 0.520 | 0.508 | 0.482    | 0.990 |
| 2.428               | 0.69                      | 0.31               | 0.3397             | 0.6336           | 0.2003           | 0.3950         | 2.2      | 0.628                     | 0.291   | 0.512 | 0.498 | 0.500    | 0.998 |
| 2.383               | 0.69                      | 0.31               | 0.3647             | 0.6148           | 0.1740           | 0.3960         | 2.5      | 0.589                     | 0.281   | 0.507 | 0.486 | 0.519    | 1.006 |
| 2.352               | 0.69                      | 0.31               | 0.3906             | 0.5974           | 0.1474           | 0.3989         | 3.0      | 0.554                     | 0.277   | 0.505 | 0.474 | 0.542    | 1.016 |
| 2.346               | 0.69                      | 0.31               | 0.4075             | 0.5864           | 0.1220           | 0.4111         | 3.5      | 0.543                     | 0.270   | 0.513 | 0.469 | 0.552    | 1.021 |
| 2.348               | 0.69                      | 0.31               | 0.4164             | 0.5824           | 0.1085           | 0.4175         | 4.0      | 0.534                     | 0.269   | 0.519 | 0.466 | 0.560    | 1.026 |
| 2.367               | 0.69                      | 0.31               | 0.4312             | 0.5761           | 0.0816           | 0.4339         | $\infty$ | 0.521                     | 0.268   | 0.552 | 0.457 | 0.569    | 1.026 |
| 3.804               | 0.75                      | 0.25               | 0.1295             | 0.9038           | 0.4260           | 0.4209         | 1.1      | 1.069                     | 0.698   | 0.815 | 0.644 | 0.578    | 1.221 |
| 3.104               | 0.75                      | 0.25               | 0.1922             | 0.8159           | 0.3559           | 0.3507         | 1.45     | 0.875                     | 0.489   | 0.685 | 0.572 | 0.484    | 1.056 |
| 2.634               | 0.75                      | 0.25               | 0.2699             | 0.7330           | 0.2826           | 0.3121         | 2.0      | 0.681                     | 0.374   | 0.579 | 0.527 | 0.474    | 1.000 |
| 2.551               | 0.75                      | 0.25               | 0.2888             | 0.7143           | 0.2639           | 0.3091         | 2.2      | 0.638                     | 0.357   | 0.558 | 0.517 | 0.481    | 0.998 |
| 2.472               | 0.75                      | 0.25               | 0.3118             | 0.6921           | 0.2496           | 0.2955         | 2.5      | 0.590                     | 0.342   | 0.541 | 0.501 | 0.498    | 0.999 |

|       |      |      |         |        |        |         |          |       |       |       |       |       |       |
|-------|------|------|---------|--------|--------|---------|----------|-------|-------|-------|-------|-------|-------|
| 2.398 | 0.75 | 0.25 | 0.3335  | 0.6729 | 0.2281 | 0.2943  | 3.0      | 0.540 | 0.328 | 0.526 | 0.489 | 0.515 | 1.004 |
| 2.368 | 0.75 | 0.25 | 0.3498  | 0.6647 | 0.2053 | 0.3045  | 3.5      | 0.514 | 0.321 | 0.525 | 0.482 | 0.525 | 1.008 |
| 2.357 | 0.75 | 0.25 | 0.3601  | 0.6582 | 0.1917 | 0.3086  | 4.0      | 0.500 | 0.319 | 0.529 | 0.476 | 0.532 | 1.008 |
| 2.358 | 0.75 | 0.25 | 0.3755  | 0.6514 | 0.1638 | 0.3267  | $\infty$ | 0.481 | 0.317 | 0.556 | 0.466 | 0.537 | 1.003 |
| 6.195 | 1.00 | 0.00 | -0.0601 | 1.2348 | 0.7766 | 0.0267  | 1.1      | 1.437 | 1.381 | 1.526 | 0.915 | 0.936 | 1.851 |
| 5.257 | 1.00 | 0.00 | -0.0136 | 1.1566 | 0.6961 | -0.0592 | 1.45     | 1.175 | 1.109 | 1.355 | 0.796 | 0.822 | 1.619 |
| 4.568 | 1.00 | 0.00 | 0.0745  | 1.0584 | 0.5820 | -0.0650 | 2.0      | 0.952 | 0.970 | 1.182 | 0.729 | 0.735 | 1.464 |
| 4.429 | 1.00 | 0.00 | 0.0977  | 1.0359 | 0.5582 | -0.0651 | 2.2      | 0.906 | 0.945 | 1.144 | 0.713 | 0.720 | 1.434 |
| 4.282 | 1.00 | 0.00 | 0.1172  | 1.0262 | 0.5181 | -0.0548 | 2.5      | 0.855 | 0.922 | 1.099 | 0.705 | 0.701 | 1.406 |
| 4.141 | 1.00 | 0.00 | 0.1405  | 1.0178 | 0.4743 | -0.0443 | 3.0      | 0.805 | 0.901 | 1.058 | 0.693 | 0.684 | 1.377 |
| 4.068 | 1.00 | 0.00 | 0.1580  | 1.0165 | 0.4339 | -0.0315 | 3.5      | 0.779 | 0.894 | 1.034 | 0.685 | 0.678 | 1.363 |
| 4.029 | 1.00 | 0.00 | 0.1643  | 1.0162 | 0.4240 | -0.0325 | 4.0      | 0.765 | 0.887 | 1.025 | 0.678 | 0.675 | 1.353 |
| 3.968 | 1.00 | 0.00 | 0.1710  | 1.0175 | 0.4025 | -0.0194 | $\infty$ | 0.736 | 0.880 | 1.015 | 0.675 | 0.661 | 1.337 |

<sup>[a]</sup>All results are with fixed  $a_1 = 0$ ;  $s_8 = 0$ ; and  $a_2 = 5.5$

**Table S5:** Optimized parameters, total WTAD2 and its decomposition into major subcategories for  $\kappa$ DH<sub>X</sub>-PBEP86-D3BJ. Heatmapping is from red (worst) via yellow to green (best). Thermo=Small Molecule Thermochemistry; Barrier=barrier heights; Large=reaction energies for large systems; Conf=conformer/intramolecular interactions; Intermol=intermolecular interactions; and NCI= Total Non-Covalent Interaction (Conformer/Intramolecular + Intermolecular).

| WTAD2<br>(kcal/mol) | Parameters <sup>[a]</sup> |                    |                    |                  |                  |                |          | $\Delta$ WTAD2 (kcal/mol) |         |       |       |          |       |
|---------------------|---------------------------|--------------------|--------------------|------------------|------------------|----------------|----------|---------------------------|---------|-------|-------|----------|-------|
|                     | C <sub>X,HF</sub>         | C <sub>X,DFT</sub> | C <sub>C,DFT</sub> | C <sub>Zab</sub> | C <sub>Zss</sub> | S <sub>6</sub> | K        | Thermo                    | Barrier | Large | Conf  | Intermol | NCI   |
| 3.399               | 0.50                      | 0.50               | 0.2913             | 0.4083           | 0.4083           | 0.7315         | 1.1      | 1.220                     | 0.377   | 0.569 | 0.645 | 0.588    | 1.232 |
| 3.366               | 0.50                      | 0.50               | 0.3603             | 0.3288           | 0.3288           | 0.7018         | 1.45     | 1.136                     | 0.403   | 0.591 | 0.621 | 0.616    | 1.237 |
| 3.454               | 0.50                      | 0.50               | 0.4261             | 0.2578           | 0.2578           | 0.7110         | 2.0      | 1.108                     | 0.421   | 0.640 | 0.616 | 0.669    | 1.285 |
| 3.489               | 0.50                      | 0.50               | 0.4392             | 0.2437           | 0.2437           | 0.7159         | 2.2      | 1.108                     | 0.424   | 0.655 | 0.618 | 0.683    | 1.301 |
| 3.533               | 0.50                      | 0.50               | 0.4583             | 0.2260           | 0.2260           | 0.7244         | 2.5      | 1.108                     | 0.426   | 0.670 | 0.618 | 0.711    | 1.329 |
| 3.590               | 0.50                      | 0.50               | 0.4708             | 0.2090           | 0.2090           | 0.7396         | 3.0      | 1.126                     | 0.419   | 0.697 | 0.625 | 0.723    | 1.348 |
| 3.629               | 0.50                      | 0.50               | 0.4896             | 0.1980           | 0.1980           | 0.7354         | 3.5      | 1.115                     | 0.429   | 0.705 | 0.626 | 0.753    | 1.379 |
| 3.654               | 0.50                      | 0.50               | 0.4966             | 0.1924           | 0.1924           | 0.7373         | 4.0      | 1.117                     | 0.432   | 0.716 | 0.628 | 0.763    | 1.391 |
| 3.730               | 0.50                      | 0.50               | 0.5113             | 0.1776           | 0.1776           | 0.7525         | $\infty$ | 1.141                     | 0.422   | 0.751 | 0.632 | 0.785    | 1.416 |
| 3.231               | 0.55                      | 0.45               | 0.2366             | 0.4767           | 0.4767           | 0.6656         | 1.1      | 1.214                     | 0.366   | 0.511 | 0.625 | 0.515    | 1.140 |
| 3.080               | 0.55                      | 0.45               | 0.3158             | 0.3862           | 0.3862           | 0.6319         | 1.45     | 1.096                     | 0.344   | 0.521 | 0.588 | 0.531    | 1.119 |
| 3.129               | 0.55                      | 0.45               | 0.3825             | 0.3194           | 0.3194           | 0.6195         | 2.0      | 1.027                     | 0.371   | 0.556 | 0.579 | 0.596    | 1.176 |
| 3.162               | 0.55                      | 0.45               | 0.4001             | 0.3036           | 0.3036           | 0.6184         | 2.2      | 1.015                     | 0.380   | 0.568 | 0.579 | 0.620    | 1.198 |
| 3.206               | 0.55                      | 0.45               | 0.4222             | 0.2839           | 0.2839           | 0.6219         | 2.5      | 1.008                     | 0.386   | 0.585 | 0.579 | 0.648    | 1.227 |
| 3.264               | 0.55                      | 0.45               | 0.4446             | 0.2654           | 0.2654           | 0.6272         | 3.0      | 1.001                     | 0.397   | 0.602 | 0.580 | 0.685    | 1.265 |
| 3.304               | 0.55                      | 0.45               | 0.4598             | 0.2505           | 0.2505           | 0.6356         | 3.5      | 1.011                     | 0.389   | 0.619 | 0.585 | 0.700    | 1.285 |
| 3.331               | 0.55                      | 0.45               | 0.4690             | 0.2423           | 0.2423           | 0.6389         | 4.0      | 1.015                     | 0.387   | 0.630 | 0.588 | 0.710    | 1.298 |
| 3.405               | 0.55                      | 0.45               | 0.4880             | 0.2236           | 0.2236           | 0.6574         | $\infty$ | 1.040                     | 0.374   | 0.664 | 0.591 | 0.736    | 1.326 |
| 3.214               | 0.58                      | 0.42               | 0.2161             | 0.5090           | 0.5090           | 0.6271         | 1.1      | 1.211                     | 0.375   | 0.507 | 0.621 | 0.499    | 1.121 |
| 2.981               | 0.58                      | 0.42               | 0.2782             | 0.4333           | 0.4333           | 0.5729         | 1.45     | 1.082                     | 0.342   | 0.491 | 0.583 | 0.485    | 1.067 |
| 2.979               | 0.58                      | 0.42               | 0.3625             | 0.3509           | 0.3509           | 0.5668         | 2.0      | 0.991                     | 0.341   | 0.521 | 0.563 | 0.564    | 1.127 |
| 3.005               | 0.58                      | 0.42               | 0.3814             | 0.3326           | 0.3326           | 0.5703         | 2.2      | 0.981                     | 0.343   | 0.533 | 0.562 | 0.586    | 1.147 |
| 3.044               | 0.58                      | 0.42               | 0.4041             | 0.3153           | 0.3153           | 0.5666         | 2.5      | 0.962                     | 0.358   | 0.545 | 0.560 | 0.620    | 1.180 |
| 3.098               | 0.58                      | 0.42               | 0.4237             | 0.2988           | 0.2988           | 0.5688         | 3.0      | 0.951                     | 0.372   | 0.562 | 0.561 | 0.652    | 1.214 |
| 3.137               | 0.58                      | 0.42               | 0.4344             | 0.2875           | 0.2875           | 0.5749         | 3.5      | 0.957                     | 0.372   | 0.579 | 0.565 | 0.665    | 1.230 |
| 3.165               | 0.58                      | 0.42               | 0.4468             | 0.2769           | 0.2769           | 0.5799         | 4.0      | 0.961                     | 0.368   | 0.591 | 0.567 | 0.679    | 1.246 |
| 3.214               | 0.58                      | 0.42               | 0.4597             | 0.2626           | 0.2626           | 0.5968         | $\infty$ | 0.984                     | 0.347   | 0.623 | 0.565 | 0.695    | 1.260 |
| 3.323               | 0.63                      | 0.37               | 0.1741             | 0.5767           | 0.5767           | 0.5487         | 1.1      | 1.212                     | 0.433   | 0.543 | 0.626 | 0.510    | 1.135 |
| 2.931               | 0.63                      | 0.37               | 0.2364             | 0.4966           | 0.4966           | 0.4911         | 1.45     | 1.064                     | 0.350   | 0.486 | 0.578 | 0.453    | 1.032 |
| 2.820               | 0.63                      | 0.37               | 0.3131             | 0.4153           | 0.4153           | 0.4772         | 2.0      | 0.963                     | 0.323   | 0.482 | 0.551 | 0.501    | 1.052 |
| 2.826               | 0.63                      | 0.37               | 0.3396             | 0.3931           | 0.3931           | 0.4752         | 2.2      | 0.938                     | 0.320   | 0.493 | 0.545 | 0.530    | 1.075 |
| 2.844               | 0.63                      | 0.37               | 0.3594             | 0.3767           | 0.3767           | 0.4687         | 2.5      | 0.915                     | 0.328   | 0.504 | 0.543 | 0.555    | 1.098 |
| 2.886               | 0.63                      | 0.37               | 0.3796             | 0.3596           | 0.3596           | 0.4698         | 3.0      | 0.898                     | 0.338   | 0.521 | 0.543 | 0.586    | 1.129 |
| 2.919               | 0.63                      | 0.37               | 0.3992             | 0.3430           | 0.3430           | 0.4749         | 3.5      | 0.895                     | 0.334   | 0.537 | 0.544 | 0.610    | 1.154 |
| 2.945               | 0.63                      | 0.37               | 0.4078             | 0.3346           | 0.3346           | 0.4833         | 4.0      | 0.897                     | 0.333   | 0.547 | 0.543 | 0.625    | 1.168 |
| 3.015               | 0.63                      | 0.37               | 0.4220             | 0.3220           | 0.3220           | 0.4906         | $\infty$ | 0.900                     | 0.339   | 0.586 | 0.543 | 0.647    | 1.190 |
| 3.609               | 0.69                      | 0.31               | 0.1296             | 0.6531           | 0.6531           | 0.4548         | 1.1      | 1.234                     | 0.533   | 0.646 | 0.645 | 0.551    | 1.196 |
| 3.070               | 0.69                      | 0.31               | 0.1875             | 0.5744           | 0.5744           | 0.3849         | 1.45     | 1.059                     | 0.406   | 0.554 | 0.584 | 0.466    | 1.050 |
| 2.808               | 0.69                      | 0.31               | 0.2703             | 0.4911           | 0.4911           | 0.3582         | 2.0      | 0.926                     | 0.355   | 0.500 | 0.545 | 0.482    | 1.027 |
| 2.784               | 0.69                      | 0.31               | 0.2881             | 0.4737           | 0.4737           | 0.3575         | 2.2      | 0.902                     | 0.352   | 0.495 | 0.540 | 0.495    | 1.036 |
| 2.773               | 0.69                      | 0.31               | 0.3064             | 0.4567           | 0.4567           | 0.3543         | 2.5      | 0.877                     | 0.353   | 0.493 | 0.536 | 0.514    | 1.050 |
| 2.779               | 0.69                      | 0.31               | 0.3290             | 0.4370           | 0.4370           | 0.3547         | 3.0      | 0.852                     | 0.358   | 0.497 | 0.530 | 0.542    | 1.072 |
| 2.796               | 0.69                      | 0.31               | 0.3418             | 0.4259           | 0.4259           | 0.3586         | 3.5      | 0.840                     | 0.363   | 0.505 | 0.527 | 0.561    | 1.088 |
| 2.814               | 0.69                      | 0.31               | 0.3493             | 0.4196           | 0.4196           | 0.3579         | 4.0      | 0.834                     | 0.368   | 0.516 | 0.526 | 0.571    | 1.097 |
| 2.872               | 0.69                      | 0.31               | 0.3661             | 0.4073           | 0.4073           | 0.3629         | $\infty$ | 0.824                     | 0.378   | 0.550 | 0.522 | 0.600    | 1.121 |
| 4.004               | 0.75                      | 0.25               | 0.0607             | 0.7559           | 0.7559           | 0.3614         | 1.1      | 1.267                     | 0.655   | 0.789 | 0.689 | 0.603    | 1.292 |
| 3.363               | 0.75                      | 0.25               | 0.1295             | 0.6625           | 0.6625           | 0.2861         | 1.45     | 1.075                     | 0.499   | 0.675 | 0.614 | 0.501    | 1.115 |
| 2.989               | 0.75                      | 0.25               | 0.2170             | 0.5721           | 0.5721           | 0.2505         | 2.0      | 0.920                     | 0.431   | 0.583 | 0.566 | 0.489    | 1.055 |
| 2.933               | 0.75                      | 0.25               | 0.2425             | 0.5476           | 0.5476           | 0.2516         | 2.2      | 0.894                     | 0.422   | 0.565 | 0.554 | 0.497    | 1.052 |
| 2.888               | 0.75                      | 0.25               | 0.2650             | 0.5300           | 0.5300           | 0.2371         | 2.5      | 0.860                     | 0.419   | 0.552 | 0.545 | 0.512    | 1.057 |

|       |      |      |         |        |        |         |          |       |       |       |       |       |       |
|-------|------|------|---------|--------|--------|---------|----------|-------|-------|-------|-------|-------|-------|
| 2.863 | 0.75 | 0.25 | 0.2874  | 0.5096 | 0.5096 | 0.2404  | 3.0      | 0.834 | 0.420 | 0.543 | 0.539 | 0.527 | 1.066 |
| 2.864 | 0.75 | 0.25 | 0.3019  | 0.4990 | 0.4990 | 0.2329  | 3.5      | 0.816 | 0.425 | 0.546 | 0.535 | 0.542 | 1.077 |
| 2.870 | 0.75 | 0.25 | 0.3070  | 0.4934 | 0.4934 | 0.2359  | 4.0      | 0.810 | 0.429 | 0.550 | 0.533 | 0.548 | 1.081 |
| 2.900 | 0.75 | 0.25 | 0.3190  | 0.4846 | 0.4846 | 0.2384  | $\infty$ | 0.796 | 0.442 | 0.575 | 0.523 | 0.564 | 1.087 |
| 6.317 | 1.00 | 0.00 | -0.1264 | 1.1149 | 1.1149 | -0.0507 | 1.1      | 1.567 | 1.290 | 1.541 | 0.955 | 0.965 | 1.919 |
| 5.438 | 1.00 | 0.00 | -0.0722 | 1.0278 | 1.0278 | -0.1395 | 1.45     | 1.306 | 1.062 | 1.395 | 0.849 | 0.826 | 1.675 |
| 4.858 | 1.00 | 0.00 | 0.0222  | 0.9244 | 0.9244 | -0.1831 | 2.0      | 1.119 | 0.967 | 1.259 | 0.769 | 0.745 | 1.513 |
| 4.758 | 1.00 | 0.00 | 0.0404  | 0.9010 | 0.9010 | -0.1835 | 2.2      | 1.095 | 0.952 | 1.222 | 0.751 | 0.739 | 1.490 |
| 4.665 | 1.00 | 0.00 | 0.0617  | 0.8795 | 0.8795 | -0.1840 | 2.5      | 1.063 | 0.942 | 1.196 | 0.741 | 0.723 | 1.464 |
| 4.585 | 1.00 | 0.00 | 0.0832  | 0.8599 | 0.8599 | -0.1978 | 3.0      | 1.034 | 0.936 | 1.165 | 0.722 | 0.728 | 1.450 |
| 4.553 | 1.00 | 0.00 | 0.0957  | 0.8474 | 0.8474 | -0.1952 | 3.5      | 1.027 | 0.935 | 1.152 | 0.716 | 0.724 | 1.439 |
| 4.540 | 1.00 | 0.00 | 0.1008  | 0.8398 | 0.8398 | -0.1857 | 4.0      | 1.027 | 0.937 | 1.146 | 0.715 | 0.716 | 1.431 |
| 4.534 | 1.00 | 0.00 | 0.1075  | 0.8306 | 0.8306 | -0.1746 | $\infty$ | 1.024 | 0.943 | 1.150 | 0.713 | 0.705 | 1.417 |

<sup>[a]</sup>All results are with fixed  $a_1 = 0$ ;  $s_8 = 0$ ; and  $a_2 = 5.5$



**Table S6:** Optimized parameters, total WTAD2 and its decomposition into major subcategories for  $\kappa$ DOD $\chi$ -PBEP86-D3BJ. Heatmapping is from red (worst) via yellow to green (best). Thermo=Small Molecule Thermochemistry; Barrier=barrier heights; Large=reaction energies for large systems; Conf=conformer/intramolecular interactions; Intermol=intermolecular interactions; and NCI= Total Non-Covalent Interaction (Conformer/Intramolecular + Intermolecular).

| WTAD2<br>(kcal/mol) | Parameters <sup>[a]</sup> |                    |                    |                  |                  |                |          | $\Delta$ WTAD2 (kcal/mol) |         |       |       |          |       |
|---------------------|---------------------------|--------------------|--------------------|------------------|------------------|----------------|----------|---------------------------|---------|-------|-------|----------|-------|
|                     | C <sub>X,HF</sub>         | C <sub>X,DFT</sub> | C <sub>C,DFT</sub> | C <sub>Zab</sub> | C <sub>2ss</sub> | S <sub>6</sub> | K        | Thermo                    | Barrier | Large | Conf  | Intermol | NCI   |
| 3.090               | 0.50                      | 0.50               | 0.3449             | 0.6243           | 0.0              | 0.8050         | 1.1      | 0.932                     | 0.371   | 0.610 | 0.616 | 0.562    | 1.178 |
| 3.024               | 0.50                      | 0.50               | 0.4044             | 0.5270           | 0.0              | 0.7511         | 1.45     | 0.864                     | 0.388   | 0.597 | 0.586 | 0.589    | 1.176 |
| 3.099               | 0.50                      | 0.50               | 0.4697             | 0.4360           | 0.0              | 0.7209         | 2.0      | 0.819                     | 0.438   | 0.613 | 0.571 | 0.658    | 1.230 |
| 3.135               | 0.50                      | 0.50               | 0.4842             | 0.4161           | 0.0              | 0.7173         | 2.2      | 0.814                     | 0.448   | 0.622 | 0.570 | 0.680    | 1.250 |
| 3.180               | 0.50                      | 0.50               | 0.5059             | 0.3915           | 0.0              | 0.7094         | 2.5      | 0.803                     | 0.463   | 0.633 | 0.567 | 0.714    | 1.281 |
| 3.240               | 0.50                      | 0.50               | 0.5234             | 0.3599           | 0.0              | 0.7185         | 3.0      | 0.820                     | 0.458   | 0.657 | 0.569 | 0.736    | 1.305 |
| 3.284               | 0.50                      | 0.50               | 0.5332             | 0.3424           | 0.0              | 0.7239         | 3.5      | 0.832                     | 0.456   | 0.676 | 0.573 | 0.748    | 1.321 |
| 3.316               | 0.50                      | 0.50               | 0.5407             | 0.3323           | 0.0              | 0.7242         | 4.0      | 0.837                     | 0.457   | 0.688 | 0.575 | 0.758    | 1.333 |
| 3.417               | 0.50                      | 0.50               | 0.5581             | 0.3024           | 0.0              | 0.7367         | $\infty$ | 0.876                     | 0.442   | 0.735 | 0.582 | 0.784    | 1.365 |
| 3.021               | 0.55                      | 0.45               | 0.3164             | 0.7010           | 0.0              | 0.7613         | 1.1      | 0.915                     | 0.378   | 0.617 | 0.606 | 0.506    | 1.112 |
| 2.817               | 0.55                      | 0.45               | 0.3754             | 0.5964           | 0.0              | 0.7131         | 1.45     | 0.829                     | 0.332   | 0.570 | 0.564 | 0.522    | 1.087 |
| 2.792               | 0.55                      | 0.45               | 0.4340             | 0.5133           | 0.0              | 0.6711         | 2.0      | 0.765                     | 0.355   | 0.552 | 0.540 | 0.580    | 1.120 |
| 2.807               | 0.55                      | 0.45               | 0.4552             | 0.4862           | 0.0              | 0.6651         | 2.2      | 0.749                     | 0.362   | 0.557 | 0.531 | 0.609    | 1.140 |
| 2.834               | 0.55                      | 0.45               | 0.4759             | 0.4620           | 0.0              | 0.6547         | 2.5      | 0.731                     | 0.373   | 0.566 | 0.526 | 0.638    | 1.164 |
| 2.873               | 0.55                      | 0.45               | 0.4992             | 0.4327           | 0.0              | 0.6524         | 3.0      | 0.717                     | 0.382   | 0.579 | 0.522 | 0.674    | 1.196 |
| 2.906               | 0.55                      | 0.45               | 0.5123             | 0.4139           | 0.0              | 0.6527         | 3.5      | 0.717                     | 0.382   | 0.594 | 0.523 | 0.691    | 1.213 |
| 2.931               | 0.55                      | 0.45               | 0.5204             | 0.4020           | 0.0              | 0.6572         | 4.0      | 0.718                     | 0.383   | 0.603 | 0.522 | 0.705    | 1.227 |
| 3.020               | 0.55                      | 0.45               | 0.5348             | 0.3731           | 0.0              | 0.6747         | $\infty$ | 0.752                     | 0.368   | 0.647 | 0.527 | 0.726    | 1.253 |
| 3.080               | 0.58                      | 0.42               | 0.3083             | 0.7364           | 0.0              | 0.7310         | 1.1      | 0.916                     | 0.413   | 0.650 | 0.608 | 0.493    | 1.101 |
| 2.778               | 0.58                      | 0.42               | 0.3642             | 0.6358           | 0.0              | 0.6782         | 1.45     | 0.814                     | 0.323   | 0.590 | 0.557 | 0.495    | 1.053 |
| 2.677               | 0.58                      | 0.42               | 0.4188             | 0.5541           | 0.0              | 0.6368         | 2.0      | 0.740                     | 0.318   | 0.545 | 0.528 | 0.547    | 1.075 |
| 2.673               | 0.58                      | 0.42               | 0.4352             | 0.5316           | 0.0              | 0.6318         | 2.2      | 0.722                     | 0.322   | 0.541 | 0.521 | 0.568    | 1.089 |
| 2.679               | 0.58                      | 0.42               | 0.4569             | 0.5043           | 0.0              | 0.6252         | 2.5      | 0.702                     | 0.328   | 0.543 | 0.511 | 0.597    | 1.107 |
| 2.703               | 0.58                      | 0.42               | 0.4837             | 0.4729           | 0.0              | 0.6178         | 3.0      | 0.680                     | 0.335   | 0.552 | 0.500 | 0.635    | 1.135 |
| 2.725               | 0.58                      | 0.42               | 0.4977             | 0.4545           | 0.0              | 0.6166         | 3.5      | 0.671                     | 0.337   | 0.563 | 0.499 | 0.654    | 1.153 |
| 2.742               | 0.58                      | 0.42               | 0.5038             | 0.4458           | 0.0              | 0.6181         | 4.0      | 0.668                     | 0.338   | 0.573 | 0.500 | 0.664    | 1.164 |
| 2.786               | 0.58                      | 0.42               | 0.5151             | 0.4258           | 0.0              | 0.6281         | $\infty$ | 0.677                     | 0.320   | 0.609 | 0.500 | 0.680    | 1.179 |
| 3.305               | 0.63                      | 0.37               | 0.2856             | 0.8226           | 0.0              | 0.6731         | 1.1      | 0.962                     | 0.508   | 0.725 | 0.613 | 0.499    | 1.111 |
| 2.844               | 0.63                      | 0.37               | 0.3336             | 0.7191           | 0.0              | 0.6219         | 1.45     | 0.823                     | 0.354   | 0.639 | 0.568 | 0.460    | 1.028 |
| 2.601               | 0.63                      | 0.37               | 0.3953             | 0.6234           | 0.0              | 0.5773         | 2.0      | 0.717                     | 0.283   | 0.571 | 0.523 | 0.508    | 1.030 |
| 2.563               | 0.63                      | 0.37               | 0.4111             | 0.6020           | 0.0              | 0.5675         | 2.2      | 0.694                     | 0.279   | 0.556 | 0.511 | 0.523    | 1.035 |
| 2.525               | 0.63                      | 0.37               | 0.4280             | 0.5782           | 0.0              | 0.5634         | 2.5      | 0.668                     | 0.275   | 0.538 | 0.502 | 0.543    | 1.044 |
| 2.506               | 0.63                      | 0.37               | 0.4525             | 0.5491           | 0.0              | 0.5533         | 3.0      | 0.640                     | 0.276   | 0.535 | 0.484 | 0.572    | 1.056 |
| 2.504               | 0.63                      | 0.37               | 0.4641             | 0.5326           | 0.0              | 0.5537         | 3.5      | 0.626                     | 0.273   | 0.539 | 0.480 | 0.587    | 1.066 |
| 2.507               | 0.63                      | 0.37               | 0.4724             | 0.5237           | 0.0              | 0.5519         | 4.0      | 0.615                     | 0.274   | 0.543 | 0.475 | 0.600    | 1.075 |
| 2.544               | 0.63                      | 0.37               | 0.4878             | 0.4993           | 0.0              | 0.5660         | $\infty$ | 0.600                     | 0.271   | 0.575 | 0.471 | 0.628    | 1.098 |
| 3.702               | 0.69                      | 0.31               | 0.2639             | 0.9147           | 0.0              | 0.6046         | 1.1      | 1.034                     | 0.661   | 0.861 | 0.626 | 0.521    | 1.146 |
| 3.113               | 0.69                      | 0.31               | 0.3128             | 0.8131           | 0.0              | 0.5470         | 1.45     | 0.875                     | 0.460   | 0.739 | 0.570 | 0.468    | 1.039 |
| 2.720               | 0.69                      | 0.31               | 0.3598             | 0.7291           | 0.0              | 0.4979         | 2.0      | 0.742                     | 0.326   | 0.635 | 0.536 | 0.481    | 1.017 |
| 2.642               | 0.69                      | 0.31               | 0.3733             | 0.7080           | 0.0              | 0.4861         | 2.2      | 0.711                     | 0.304   | 0.610 | 0.526 | 0.490    | 1.017 |
| 2.561               | 0.69                      | 0.31               | 0.3941             | 0.6790           | 0.0              | 0.4764         | 2.5      | 0.672                     | 0.287   | 0.584 | 0.510 | 0.509    | 1.018 |
| 2.481               | 0.69                      | 0.31               | 0.4193             | 0.6480           | 0.0              | 0.4651         | 3.0      | 0.630                     | 0.273   | 0.561 | 0.485 | 0.532    | 1.017 |
| 2.439               | 0.69                      | 0.31               | 0.4308             | 0.6281           | 0.0              | 0.4694         | 3.5      | 0.605                     | 0.264   | 0.548 | 0.479 | 0.542    | 1.021 |
| 2.421               | 0.69                      | 0.31               | 0.4362             | 0.6176           | 0.0              | 0.4725         | 4.0      | 0.592                     | 0.259   | 0.548 | 0.476 | 0.547    | 1.023 |
| 2.410               | 0.69                      | 0.31               | 0.4443             | 0.6047           | 0.0              | 0.4790         | $\infty$ | 0.567                     | 0.253   | 0.569 | 0.466 | 0.556    | 1.022 |
| 4.201               | 0.75                      | 0.25               | 0.2344             | 1.0233           | 0.0              | 0.5365         | 1.1      | 1.137                     | 0.832   | 1.011 | 0.663 | 0.558    | 1.221 |
| 3.514               | 0.75                      | 0.25               | 0.2837             | 0.9252           | 0.0              | 0.4543         | 1.45     | 0.969                     | 0.598   | 0.869 | 0.579 | 0.499    | 1.077 |
| 2.992               | 0.75                      | 0.25               | 0.3419             | 0.8202           | 0.0              | 0.4143         | 2.0      | 0.791                     | 0.431   | 0.746 | 0.534 | 0.491    | 1.025 |
| 2.887               | 0.75                      | 0.25               | 0.3507             | 0.8018           | 0.0              | 0.4105         | 2.2      | 0.752                     | 0.398   | 0.711 | 0.532 | 0.494    | 1.026 |
| 2.770               | 0.75                      | 0.25               | 0.3610             | 0.7832           | 0.0              | 0.4035         | 2.5      | 0.710                     | 0.364   | 0.669 | 0.528 | 0.500    | 1.027 |

|       |      |      |        |        |     |        |          |       |       |       |       |       |       |
|-------|------|------|--------|--------|-----|--------|----------|-------|-------|-------|-------|-------|-------|
| 2.653 | 0.75 | 0.25 | 0.3796 | 0.7560 | 0.0 | 0.3921 | 3.0      | 0.662 | 0.337 | 0.629 | 0.512 | 0.513 | 1.025 |
| 2.583 | 0.75 | 0.25 | 0.3897 | 0.7394 | 0.0 | 0.3919 | 3.5      | 0.633 | 0.322 | 0.603 | 0.504 | 0.521 | 1.025 |
| 2.541 | 0.75 | 0.25 | 0.3978 | 0.7279 | 0.0 | 0.3916 | 4.0      | 0.615 | 0.315 | 0.588 | 0.496 | 0.526 | 1.023 |
| 2.492 | 0.75 | 0.25 | 0.4068 | 0.7124 | 0.0 | 0.3975 | $\infty$ | 0.586 | 0.302 | 0.591 | 0.483 | 0.530 | 1.013 |
| 6.871 | 1.00 | 0.00 | 0.1163 | 1.4450 | 0.0 | 0.2693 | 1.1      | 1.654 | 1.651 | 1.737 | 0.958 | 0.871 | 1.829 |
| 5.964 | 1.00 | 0.00 | 0.1691 | 1.3564 | 0.0 | 0.1453 | 1.45     | 1.453 | 1.345 | 1.564 | 0.812 | 0.790 | 1.601 |
| 5.211 | 1.00 | 0.00 | 0.1992 | 1.2903 | 0.0 | 0.1137 | 2.0      | 1.254 | 1.108 | 1.372 | 0.790 | 0.686 | 1.477 |
| 5.043 | 1.00 | 0.00 | 0.2085 | 1.2770 | 0.0 | 0.0980 | 2.2      | 1.213 | 1.057 | 1.324 | 0.771 | 0.678 | 1.449 |
| 4.858 | 1.00 | 0.00 | 0.2246 | 1.2563 | 0.0 | 0.0814 | 2.5      | 1.171 | 1.004 | 1.269 | 0.741 | 0.673 | 1.414 |
| 4.664 | 1.00 | 0.00 | 0.2389 | 1.2288 | 0.0 | 0.0755 | 3.0      | 1.111 | 0.965 | 1.202 | 0.716 | 0.671 | 1.386 |
| 4.558 | 1.00 | 0.00 | 0.2478 | 1.2093 | 0.0 | 0.0733 | 3.5      | 1.070 | 0.950 | 1.165 | 0.697 | 0.676 | 1.372 |
| 4.496 | 1.00 | 0.00 | 0.2547 | 1.2013 | 0.0 | 0.0698 | 4.0      | 1.056 | 0.938 | 1.145 | 0.684 | 0.673 | 1.357 |
| 4.395 | 1.00 | 0.00 | 0.2593 | 1.1853 | 0.0 | 0.0800 | $\infty$ | 1.012 | 0.927 | 1.110 | 0.678 | 0.668 | 1.346 |

<sup>[a]</sup>All results are with fixed  $a_1 = 0$ ;  $s_8 = 0$ ; and  $a_2 = 5.5$

**Table S7:** Optimized parameters, total WTAD2 and its decomposition into major subcategories for knoDispSDx-PBEP86. Heatmapping is from red (worst) via yellow to green (best). Thermo=Small Molecule Thermochemistry; Barrier=barrier heights; Large=reaction energies for large systems; Conf=conformer/intramolecular interactions; Intermol=intermolecular interactions; and NCI= Total Non-Covalent Interaction (Conformer/Intramolecular + Intermolecular).

| WTAD2<br>(kcal/mol) | Parameters <sup>[a]</sup> |                    |                    |                  |                  |                |          | $\Delta$ WTAD2 (kcal/mol) |         |       |       |          |       |
|---------------------|---------------------------|--------------------|--------------------|------------------|------------------|----------------|----------|---------------------------|---------|-------|-------|----------|-------|
|                     | C <sub>X,HF</sub>         | C <sub>X,DFT</sub> | C <sub>C,DFT</sub> | C <sub>2ab</sub> | C <sub>2ss</sub> | S <sub>6</sub> | K        | Thermo                    | Barrier | Large | Conf  | Intermol | NCI   |
| 5.721               | 0.50                      | 0.50               | 0.3345             | 0.5009           | 0.6659           | 0.0            | 1.1      | 1.308                     | 0.734   | 0.880 | 1.475 | 1.325    | 2.800 |
| 5.410               | 0.50                      | 0.50               | 0.3764             | 0.4575           | 0.5529           | 0.0            | 1.45     | 1.204                     | 0.869   | 0.848 | 1.325 | 1.163    | 2.488 |
| 5.342               | 0.50                      | 0.50               | 0.4651             | 0.3712           | 0.4429           | 0.0            | 2.0      | 1.041                     | 0.932   | 0.891 | 1.314 | 1.164    | 2.478 |
| 5.355               | 0.50                      | 0.50               | 0.4813             | 0.3566           | 0.4270           | 0.0            | 2.2      | 1.020                     | 0.959   | 0.907 | 1.308 | 1.162    | 2.469 |
| 5.389               | 0.50                      | 0.50               | 0.5129             | 0.3385           | 0.3854           | 0.0            | 2.5      | 0.976                     | 0.961   | 0.932 | 1.329 | 1.191    | 2.519 |
| 5.448               | 0.50                      | 0.50               | 0.5429             | 0.3141           | 0.3504           | 0.0            | 3.0      | 0.930                     | 0.956   | 0.968 | 1.365 | 1.228    | 2.593 |
| 5.497               | 0.50                      | 0.50               | 0.5623             | 0.3010           | 0.3294           | 0.0            | 3.5      | 0.909                     | 0.956   | 0.993 | 1.388 | 1.251    | 2.639 |
| 5.536               | 0.50                      | 0.50               | 0.5746             | 0.2893           | 0.3242           | 0.0            | 4.0      | 0.900                     | 0.964   | 1.010 | 1.401 | 1.262    | 2.662 |
| 5.663               | 0.50                      | 0.50               | 0.6049             | 0.2585           | 0.2977           | 0.0            | $\infty$ | 0.857                     | 0.926   | 1.080 | 1.475 | 1.326    | 2.801 |
| 5.260               | 0.55                      | 0.45               | 0.2682             | 0.5895           | 0.7012           | 0.0            | 1.1      | 1.299                     | 0.637   | 0.787 | 1.295 | 1.242    | 2.537 |
| 4.860               | 0.55                      | 0.45               | 0.3296             | 0.5234           | 0.5665           | 0.0            | 1.45     | 1.138                     | 0.722   | 0.749 | 1.165 | 1.086    | 2.251 |
| 4.747               | 0.55                      | 0.45               | 0.4166             | 0.4404           | 0.4628           | 0.0            | 2.0      | 0.985                     | 0.807   | 0.776 | 1.128 | 1.052    | 2.180 |
| 4.751               | 0.55                      | 0.45               | 0.4392             | 0.4218           | 0.4374           | 0.0            | 2.2      | 0.948                     | 0.821   | 0.791 | 1.132 | 1.059    | 2.191 |
| 4.771               | 0.55                      | 0.45               | 0.4680             | 0.3989           | 0.4091           | 0.0            | 2.5      | 0.905                     | 0.835   | 0.813 | 1.144 | 1.074    | 2.218 |
| 4.819               | 0.55                      | 0.45               | 0.4961             | 0.3722           | 0.3848           | 0.0            | 3.0      | 0.862                     | 0.846   | 0.846 | 1.166 | 1.099    | 2.265 |
| 4.865               | 0.55                      | 0.45               | 0.5143             | 0.3537           | 0.3737           | 0.0            | 3.5      | 0.839                     | 0.855   | 0.870 | 1.184 | 1.117    | 2.301 |
| 4.903               | 0.55                      | 0.45               | 0.5299             | 0.3406           | 0.3600           | 0.0            | 4.0      | 0.819                     | 0.847   | 0.889 | 1.208 | 1.140    | 2.348 |
| 5.020               | 0.55                      | 0.45               | 0.5636             | 0.3129           | 0.3272           | 0.0            | $\infty$ | 0.778                     | 0.815   | 0.949 | 1.275 | 1.203    | 2.478 |
| 5.040               | 0.58                      | 0.42               | 0.2460             | 0.6318           | 0.7052           | 0.0            | 1.1      | 1.279                     | 0.589   | 0.761 | 1.210 | 1.202    | 2.411 |
| 4.568               | 0.58                      | 0.42               | 0.3045             | 0.5583           | 0.5757           | 0.0            | 1.45     | 1.097                     | 0.643   | 0.700 | 1.081 | 1.048    | 2.129 |
| 4.417               | 0.58                      | 0.42               | 0.3854             | 0.4835           | 0.4680           | 0.0            | 2.0      | 0.944                     | 0.723   | 0.716 | 1.032 | 1.003    | 2.035 |
| 4.413               | 0.58                      | 0.42               | 0.4144             | 0.4630           | 0.4406           | 0.0            | 2.2      | 0.906                     | 0.741   | 0.729 | 1.033 | 1.004    | 2.037 |
| 4.426               | 0.58                      | 0.42               | 0.4378             | 0.4406           | 0.4188           | 0.0            | 2.5      | 0.868                     | 0.759   | 0.750 | 1.039 | 1.011    | 2.050 |
| 4.465               | 0.58                      | 0.42               | 0.4693             | 0.4115           | 0.3947           | 0.0            | 3.0      | 0.821                     | 0.774   | 0.780 | 1.058 | 1.032    | 2.090 |
| 4.507               | 0.58                      | 0.42               | 0.4870             | 0.3927           | 0.3838           | 0.0            | 3.5      | 0.796                     | 0.781   | 0.804 | 1.076 | 1.049    | 2.126 |
| 4.542               | 0.58                      | 0.42               | 0.4986             | 0.3849           | 0.3709           | 0.0            | 4.0      | 0.783                     | 0.783   | 0.823 | 1.090 | 1.064    | 2.154 |
| 4.600               | 0.58                      | 0.42               | 0.5262             | 0.3599           | 0.3501           | 0.0            | $\infty$ | 0.737                     | 0.754   | 0.872 | 1.130 | 1.107    | 2.237 |
| 4.782               | 0.63                      | 0.37               | 0.1936             | 0.7027           | 0.7474           | 0.0            | 1.1      | 1.277                     | 0.567   | 0.741 | 1.071 | 1.127    | 2.198 |
| 4.174               | 0.63                      | 0.37               | 0.2611             | 0.6231           | 0.5981           | 0.0            | 1.45     | 1.060                     | 0.567   | 0.641 | 0.941 | 0.964    | 1.905 |
| 3.934               | 0.63                      | 0.37               | 0.3448             | 0.5467           | 0.4738           | 0.0            | 2.0      | 0.872                     | 0.597   | 0.641 | 0.890 | 0.933    | 1.823 |
| 3.917               | 0.63                      | 0.37               | 0.3670             | 0.5230           | 0.4569           | 0.0            | 2.2      | 0.835                     | 0.615   | 0.650 | 0.888 | 0.930    | 1.818 |
| 3.913               | 0.63                      | 0.37               | 0.3939             | 0.5060           | 0.4264           | 0.0            | 2.5      | 0.796                     | 0.634   | 0.662 | 0.888 | 0.932    | 1.821 |
| 3.933               | 0.63                      | 0.37               | 0.4309             | 0.4774           | 0.3956           | 0.0            | 3.0      | 0.745                     | 0.646   | 0.687 | 0.905 | 0.950    | 1.855 |
| 3.963               | 0.63                      | 0.37               | 0.4503             | 0.4603           | 0.3805           | 0.0            | 3.5      | 0.718                     | 0.651   | 0.707 | 0.920 | 0.965    | 1.886 |
| 3.992               | 0.63                      | 0.37               | 0.4572             | 0.4489           | 0.3814           | 0.0            | 4.0      | 0.710                     | 0.664   | 0.724 | 0.927 | 0.968    | 1.895 |
| 4.090               | 0.63                      | 0.37               | 0.4764             | 0.4312           | 0.3695           | 0.0            | $\infty$ | 0.695                     | 0.677   | 0.781 | 0.948 | 0.988    | 1.937 |
| 4.618               | 0.69                      | 0.31               | 0.1444             | 0.8036           | 0.7424           | 0.0            | 1.1      | 1.263                     | 0.568   | 0.783 | 0.924 | 1.078    | 2.003 |
| 3.864               | 0.69                      | 0.31               | 0.2065             | 0.7231           | 0.5995           | 0.0            | 1.45     | 1.031                     | 0.516   | 0.646 | 0.785 | 0.887    | 1.672 |
| 3.480               | 0.69                      | 0.31               | 0.2959             | 0.6381           | 0.4827           | 0.0            | 2.0      | 0.829                     | 0.516   | 0.585 | 0.731 | 0.821    | 1.551 |
| 3.439               | 0.69                      | 0.31               | 0.3145             | 0.6186           | 0.4659           | 0.0            | 2.2      | 0.791                     | 0.526   | 0.585 | 0.724 | 0.813    | 1.537 |
| 3.408               | 0.69                      | 0.31               | 0.3383             | 0.5953           | 0.4451           | 0.0            | 2.5      | 0.746                     | 0.536   | 0.592 | 0.722 | 0.813    | 1.535 |
| 3.403               | 0.69                      | 0.31               | 0.3680             | 0.5649           | 0.4214           | 0.0            | 3.0      | 0.693                     | 0.537   | 0.612 | 0.731 | 0.829    | 1.560 |
| 3.415               | 0.69                      | 0.31               | 0.3872             | 0.5464           | 0.4082           | 0.0            | 3.5      | 0.665                     | 0.542   | 0.628 | 0.740 | 0.841    | 1.580 |
| 3.433               | 0.69                      | 0.31               | 0.4049             | 0.5331           | 0.3922           | 0.0            | 4.0      | 0.641                     | 0.535   | 0.643 | 0.753 | 0.861    | 1.614 |
| 3.509               | 0.69                      | 0.31               | 0.4265             | 0.5149           | 0.3757           | 0.0            | $\infty$ | 0.618                     | 0.540   | 0.693 | 0.773 | 0.885    | 1.658 |
| 4.592               | 0.75                      | 0.25               | 0.1094             | 0.8806           | 0.7575           | 0.0            | 1.1      | 1.256                     | 0.625   | 0.877 | 0.823 | 1.011    | 1.835 |
| 3.742               | 0.75                      | 0.25               | 0.1750             | 0.8003           | 0.5994           | 0.0            | 1.45     | 0.999                     | 0.512   | 0.723 | 0.681 | 0.828    | 1.509 |
| 3.224               | 0.75                      | 0.25               | 0.2502             | 0.7250           | 0.4890           | 0.0            | 2.0      | 0.793                     | 0.474   | 0.603 | 0.613 | 0.740    | 1.353 |
| 3.144               | 0.75                      | 0.25               | 0.2680             | 0.7094           | 0.4661           | 0.0            | 2.2      | 0.751                     | 0.473   | 0.582 | 0.604 | 0.733    | 1.337 |
| 3.071               | 0.75                      | 0.25               | 0.2979             | 0.6836           | 0.4393           | 0.0            | 2.5      | 0.700                     | 0.469   | 0.570 | 0.600 | 0.733    | 1.333 |

|       |      |      |         |        |        |     |          |       |       |       |       |       |       |
|-------|------|------|---------|--------|--------|-----|----------|-------|-------|-------|-------|-------|-------|
| 3.026 | 0.75 | 0.25 | 0.3250  | 0.6611 | 0.4161 | 0.0 | 3.0      | 0.654 | 0.472 | 0.573 | 0.597 | 0.732 | 1.328 |
| 3.018 | 0.75 | 0.25 | 0.3397  | 0.6422 | 0.4107 | 0.0 | 3.5      | 0.626 | 0.476 | 0.582 | 0.600 | 0.736 | 1.335 |
| 3.023 | 0.75 | 0.25 | 0.3481  | 0.6305 | 0.4089 | 0.0 | 4.0      | 0.612 | 0.479 | 0.591 | 0.602 | 0.739 | 1.341 |
| 3.068 | 0.75 | 0.25 | 0.3598  | 0.6192 | 0.3993 | 0.0 | $\infty$ | 0.595 | 0.488 | 0.633 | 0.603 | 0.749 | 1.353 |
| 6.195 | 1.00 | 0.00 | -0.0676 | 1.2333 | 0.8180 | 0.0 | 1.1      | 1.442 | 1.359 | 1.535 | 0.913 | 0.948 | 1.860 |
| 5.266 | 1.00 | 0.00 | -0.0069 | 1.1538 | 0.6469 | 0.0 | 1.45     | 1.168 | 1.133 | 1.350 | 0.828 | 0.786 | 1.615 |
| 4.585 | 1.00 | 0.00 | 0.0743  | 1.0693 | 0.5295 | 0.0 | 2.0      | 0.946 | 0.988 | 1.181 | 0.776 | 0.693 | 1.469 |
| 4.445 | 1.00 | 0.00 | 0.0925  | 1.0532 | 0.5064 | 0.0 | 2.2      | 0.901 | 0.961 | 1.141 | 0.765 | 0.678 | 1.443 |
| 4.296 | 1.00 | 0.00 | 0.1153  | 1.0329 | 0.4797 | 0.0 | 2.5      | 0.851 | 0.937 | 1.095 | 0.747 | 0.667 | 1.414 |
| 4.150 | 1.00 | 0.00 | 0.1438  | 1.0272 | 0.4267 | 0.0 | 3.0      | 0.801 | 0.915 | 1.048 | 0.719 | 0.667 | 1.386 |
| 4.074 | 1.00 | 0.00 | 0.1529  | 1.0229 | 0.4133 | 0.0 | 3.5      | 0.774 | 0.902 | 1.027 | 0.710 | 0.661 | 1.371 |
| 4.033 | 1.00 | 0.00 | 0.1600  | 1.0173 | 0.4073 | 0.0 | 4.0      | 0.759 | 0.896 | 1.018 | 0.702 | 0.658 | 1.360 |
| 3.971 | 1.00 | 0.00 | 0.1662  | 1.0183 | 0.3938 | 0.0 | $\infty$ | 0.731 | 0.886 | 1.008 | 0.691 | 0.655 | 1.346 |

<sup>[a]</sup>All results are with fixed  $a_1 = 0$ ;  $s_8 = 0$ ; and  $a_2 = 5.5$

**Table S8:** Optimized parameters, total WTMAD2 and its decomposition into major subcategories for  $\kappa$ DSD<sub>69</sub>-PBEP86-D3BJ and  $\kappa$ DSD<sub>69</sub>-PBEPBE-D3BJ@PBE0P86. Heatmapping is from red (worst) via yellow to green (best). Thermo=Small Molecule Thermochemistry; Barrier=barrier heights; Large=reaction energies for large systems; Conf=conformer/intramolecular interactions; Intermol=intermolecular interactions; and NCI= Total Non-Covalent Interaction (Conformer/Intramolecular + Intermolecular).

| Functionals                                         | WTMAD2<br>(kcal/mol) | Parameters <sup>[a]</sup> |                  |                  |                |          | $\Delta$ WTMAD2 (kcal/mol) |         |       |       |          |       |
|-----------------------------------------------------|----------------------|---------------------------|------------------|------------------|----------------|----------|----------------------------|---------|-------|-------|----------|-------|
|                                                     |                      | C <sub>C,DFT</sub>        | C <sub>2ab</sub> | C <sub>2ss</sub> | S <sub>6</sub> | $\kappa$ | Thermo                     | Barrier | Large | Conf  | Intermol | NCI   |
| $\kappa$ DSD <sub>69</sub> -PBEP86-D3BJ@<br>PBE0P86 | 3.821                | 0.1812                    | 0.7392           | 0.2924           | 0.6121         | 1.1      | 1.136                      | 0.638   | 0.727 | 0.680 | 0.641    | 1.321 |
|                                                     | 3.081                | 0.2537                    | 0.6253           | 0.2330           | 0.5253         | 1.45     | 0.960                      | 0.424   | 0.577 | 0.600 | 0.519    | 1.120 |
|                                                     | 2.594                | 0.3415                    | 0.5054           | 0.1953           | 0.4683         | 2.0      | 0.800                      | 0.305   | 0.479 | 0.547 | 0.463    | 1.010 |
|                                                     | 2.515                | 0.3597                    | 0.4833           | 0.1880           | 0.4509         | 2.2      | 0.767                      | 0.298   | 0.455 | 0.533 | 0.462    | 0.995 |
|                                                     | 2.436                | 0.3845                    | 0.4579           | 0.1780           | 0.4331         | 2.5      | 0.726                      | 0.297   | 0.425 | 0.516 | 0.473    | 0.989 |
|                                                     | 2.366                | 0.4305                    | 0.4330           | 0.1417           | 0.4255         | 3.0      | 0.670                      | 0.296   | 0.409 | 0.484 | 0.507    | 0.991 |
|                                                     | 2.326                | 0.4587                    | 0.4165           | 0.1165           | 0.4325         | 3.5      | 0.644                      | 0.290   | 0.401 | 0.465 | 0.526    | 0.991 |
|                                                     | 2.299                | 0.4757                    | 0.4088           | 0.0977           | 0.4409         | 4.0      | 0.627                      | 0.287   | 0.393 | 0.456 | 0.537    | 0.993 |
|                                                     | 2.276                | 0.5368                    | 0.3811           | 0.0381           | 0.4883         | $\infty$ | 0.590                      | 0.242   | 0.434 | 0.419 | 0.591    | 1.010 |
| $\kappa$ DSD <sub>69</sub> -PBEP86-D3BJ             | 3.404                | 0.1713                    | 0.8220           | 0.3588           | 0.5073         | 1.1      | 1.021                      | 0.557   | 0.683 | 0.617 | 0.527    | 1.144 |
|                                                     | 2.807                | 0.2339                    | 0.7410           | 0.2935           | 0.4331         | 1.45     | 0.842                      | 0.386   | 0.576 | 0.555 | 0.449    | 1.004 |
|                                                     | 2.477                | 0.3176                    | 0.6534           | 0.2193           | 0.3953         | 2.0      | 0.665                      | 0.301   | 0.520 | 0.508 | 0.482    | 0.990 |
|                                                     | 2.428                | 0.3397                    | 0.6336           | 0.2003           | 0.3950         | 2.2      | 0.628                      | 0.291   | 0.512 | 0.498 | 0.500    | 0.998 |
|                                                     | 2.383                | 0.3647                    | 0.6148           | 0.1740           | 0.3960         | 2.5      | 0.589                      | 0.281   | 0.507 | 0.486 | 0.519    | 1.006 |
|                                                     | 2.352                | 0.3906                    | 0.5974           | 0.1474           | 0.3989         | 3.0      | 0.554                      | 0.277   | 0.505 | 0.474 | 0.542    | 1.016 |
|                                                     | 2.346                | 0.4075                    | 0.5864           | 0.1220           | 0.4111         | 3.5      | 0.543                      | 0.270   | 0.513 | 0.469 | 0.552    | 1.021 |
|                                                     | 2.348                | 0.4164                    | 0.5824           | 0.1085           | 0.4175         | 4.0      | 0.534                      | 0.269   | 0.519 | 0.466 | 0.560    | 1.026 |
|                                                     | 2.367                | 0.4312                    | 0.5761           | 0.0816           | 0.4339         | $\infty$ | 0.521                      | 0.268   | 0.552 | 0.457 | 0.569    | 1.026 |

<sup>[a]</sup>All results are with fixed  $a_1 = 0$ ;  $s_8 = 0$ ; and  $a_2 = 5.5$ .

**Table S9:** Total WTMAD2 and its decomposition into major subcategories for selected nonempirical DHDFs. Thermo=Small Molecule Thermochemistry; Barrier=barrier heights; Large=reaction energies for large systems; Conf=conformer/intramolecular interactions; Intermol=intermolecular interactions; and NCI= Total Non-Covalent Interaction (Conformer/Intramolecular + Intermolecular).

| Functionals                       | $\kappa$ | WTMAD2<br>(kcal/mol) | $\Delta$ WTMAD2 (kcal/mol) |         |       |       |          |       |
|-----------------------------------|----------|----------------------|----------------------------|---------|-------|-------|----------|-------|
|                                   |          |                      | Thermo                     | Barrier | Large | Conf  | Intermol | NCI   |
| PBE0-DH-D3BJ <sup>1,2</sup>       | 1.1      | 5.745                | 1.469                      | 0.629   | 1.282 | 1.096 | 1.270    | 2.366 |
|                                   | 1.45     | 5.637                | 1.415                      | 0.641   | 1.237 | 1.052 | 1.291    | 2.344 |
|                                   | 2.0      | 5.545                | 1.357                      | 0.657   | 1.183 | 1.027 | 1.320    | 2.347 |
|                                   | $\infty$ | 5.439                | 1.273                      | 0.698   | 1.100 | 1.003 | 1.365    | 2.368 |
| SOS1-PBE-QIDH-D3BJ <sup>3,4</sup> | 1.1      | 5.984                | 1.389                      | 0.912   | 1.354 | 1.233 | 1.096    | 2.329 |
|                                   | 1.45     | 5.233                | 1.223                      | 0.760   | 1.234 | 1.024 | 0.993    | 2.016 |
|                                   | $\infty$ | 3.838                | 0.874                      | 0.456   | 0.873 | 0.768 | 0.867    | 1.635 |
| SOSO-PBE0-2-D3BJ <sup>5,6</sup>   | 1.1      | 6.401                | 1.429                      | 1.217   | 1.452 | 1.016 | 1.287    | 2.303 |
|                                   | 1.45     | 5.347                | 1.214                      | 0.994   | 1.293 | 0.825 | 1.021    | 1.846 |
|                                   | $\infty$ | 3.461                | 0.736                      | 0.561   | 0.846 | 0.672 | 0.647    | 1.320 |
| PBE0-DH <sup>1</sup>              | 1.1      | 9.225                | 1.396                      | 0.591   | 1.545 | 2.814 | 2.879    | 5.693 |
|                                   | 1.45     | 8.822                | 1.330                      | 0.568   | 1.495 | 2.678 | 2.750    | 5.428 |
|                                   | 2.0      | 8.466                | 1.261                      | 0.563   | 1.440 | 2.565 | 2.638    | 5.203 |
|                                   | $\infty$ | 8.080                | 1.163                      | 0.568   | 1.361 | 2.465 | 2.524    | 4.989 |
| SOS1-PBE-QIDH <sup>3</sup>        | 1.1      | 9.611                | 1.374                      | 1.011   | 1.534 | 2.638 | 3.055    | 5.693 |
|                                   | 1.45     | 8.716                | 1.193                      | 0.852   | 1.411 | 2.416 | 2.843    | 5.259 |
|                                   | $\infty$ | 7.057                | 0.820                      | 0.515   | 1.074 | 2.122 | 2.525    | 4.648 |
| SOSO-PBE0-2 <sup>5</sup>          | 1.1      | 9.686                | 1.392                      | 1.345   | 1.577 | 2.409 | 2.964    | 5.373 |
|                                   | 1.45     | 8.521                | 1.176                      | 1.122   | 1.419 | 2.121 | 2.683    | 4.805 |
|                                   | $\infty$ | 6.460                | 0.700                      | 0.664   | 0.998 | 1.774 | 2.325    | 4.099 |

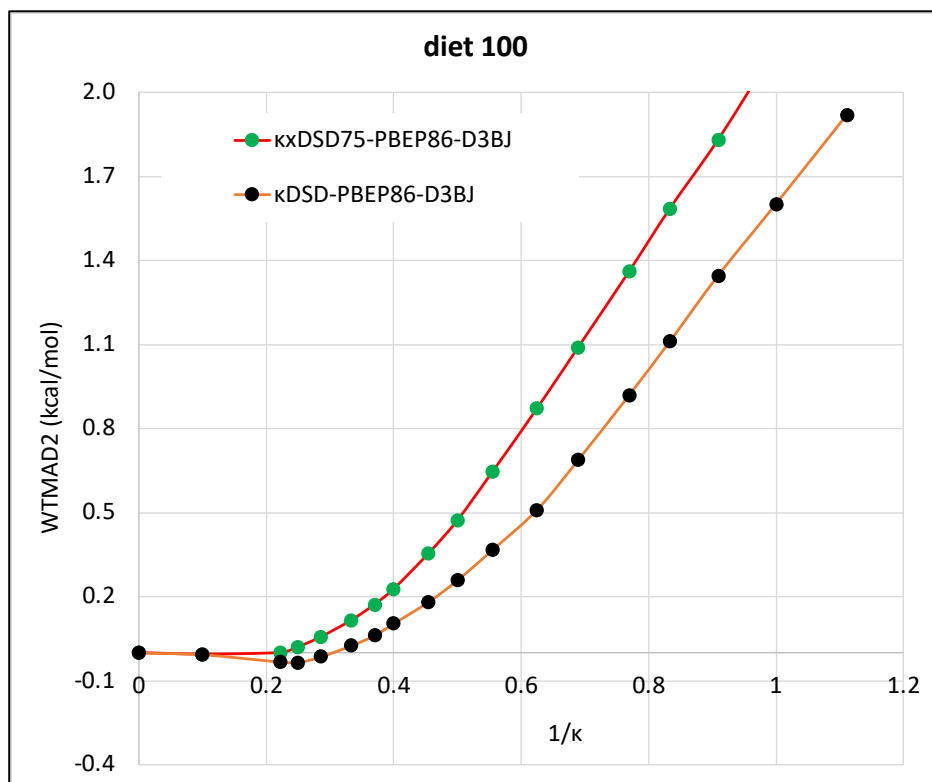

**Figure S1:** Dependence of WTMAD2 (kcal/mol) on reciprocal  $\kappa$  for  $\kappa DSD$ -PBEP86-D3BJ and  $\kappa xDS75$ -PBEP86-D3BJ.

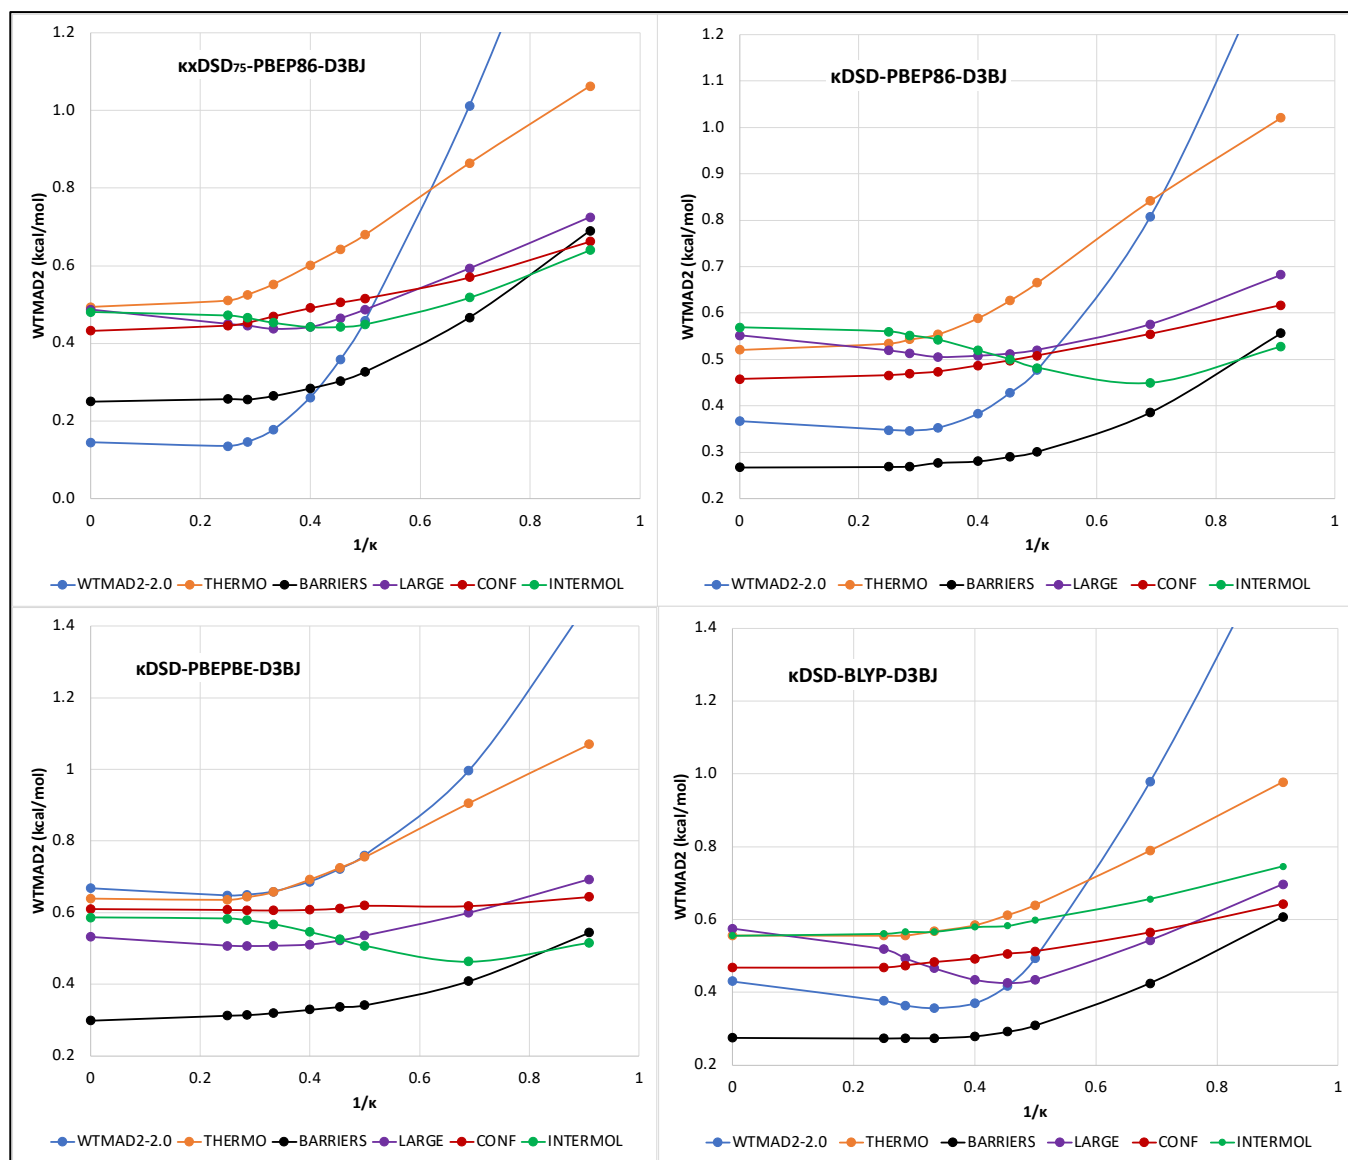

**Figure S2:** Dependence of total WTMA2 (kcal/mol) and contribution ( $\Delta$ WTMA2 in kcal/mol) from five major subcategories on reciprocal  $\kappa$  for  $\kappa \times \text{DSD}_{75}\text{-PBEP86-D3BJ}$ ,  $\kappa \text{DSD-PBEP86-D3BJ}$ ,  $\kappa \text{DSD-PBEPBE-D3BJ}$ ,  $\kappa \text{DSD-BLYP-D3BJ}$ , and  $\kappa \times \text{DSD}_{75}\text{-PBEP86-D3BJ}$ . THERMO= Small Molecule Thermochemistry; BARRIER= barrier heights; LARGE= reaction energies for large systems; CONF= conformer/intramolecular interactions; and INTERMOL= intermolecular interactions.



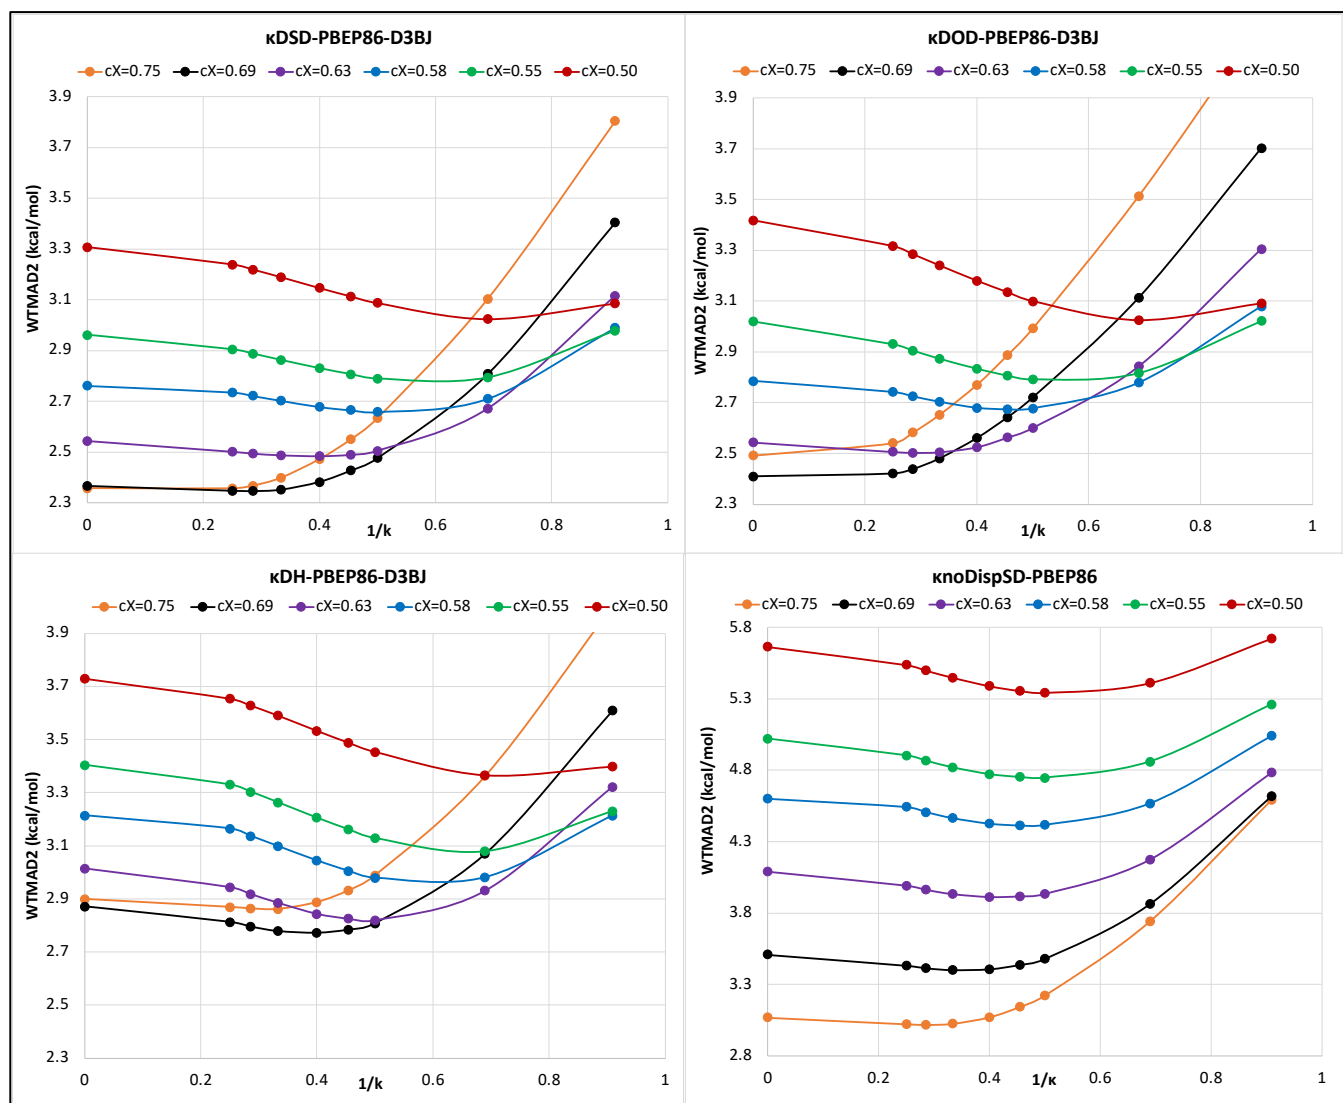

**Figure S3:** Dependence of WTMAD2 (kcal/mol) on reciprocal  $\kappa$  for  $\kappa$ DSD-PBEP86-D3BJ,  $\kappa$ DOD-PBEP86-D3BJ,  $\kappa$ DH-PBEP86-D3BJ, and  $\kappa$ noDispSD-PBEP86 functionals. Six colors represent six different fractions of exact exchange ( $c_X$ ) ranging from 0.75 to 0.50

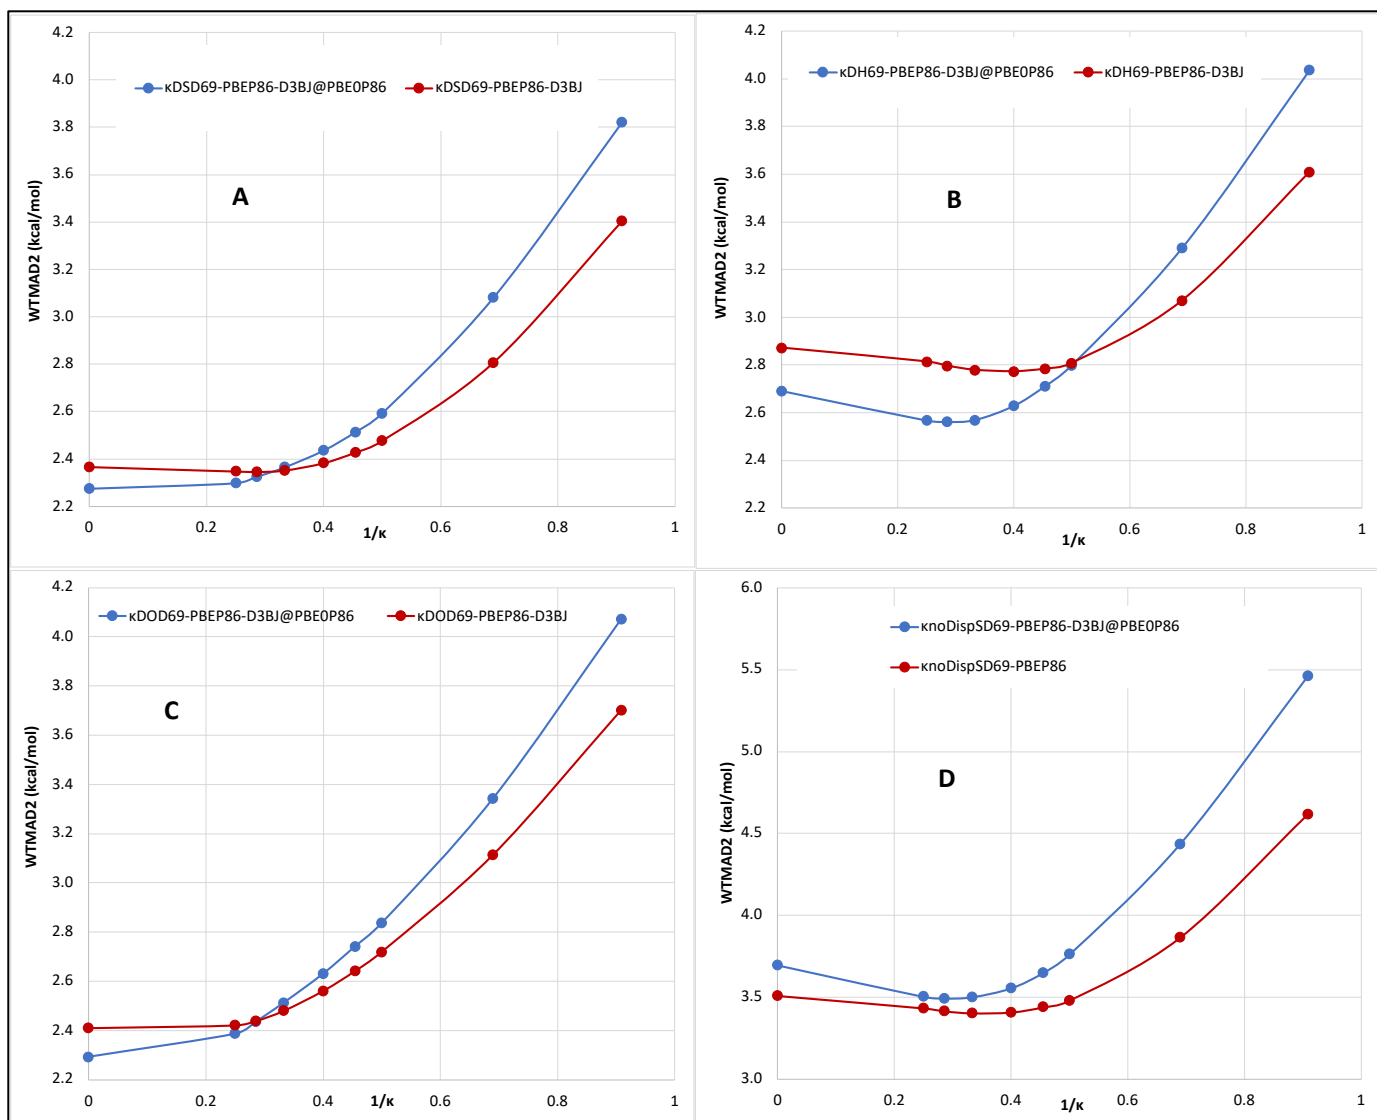

**Figure S4:** Dependence of total WTMA2 (kcal/mol) on reciprocal  $\kappa$  for  $\kappa$ DSD<sub>69</sub>-PBEP86-D3BJ@PBE0P86 and  $\kappa$ DSD<sub>69</sub>-PBEP86-D3BJ (A); their  $\kappa$ DH counterparts (B);  $\kappa$ DOD variants (C); and the dispersion-*uncorrected* forms (D).

## Sample Input:

### $\kappa$ DSD-BLYP-D3BJ ( $\kappa=2.2$ )

```
$rem
SYM_IGNORE           TRUE
SYMMETRY             false
BASIS                 def2-QZVPP
exchange             GEN
XC_GRID              3
ECP                  def2-ECP
MAX_SCF_CYCLES       1000
SCF_CONVERGENCE       7
THRESH               12
MEM_STATIC            2000
SET_ITER             100
MOLDEN_FORMAT        false
PRINT_ORBITALS        10
SCF_FINAL_PRINT       1
DFT_D                D3_BJ
DFT_D3_S6            52360
DFT_D3_S8            0
DFT_D3_A2            520000
DFT_D3_A1            0
$end

$xc_functional
C LYP 0.4387
X HF 0.7100
X B88 0.2900
$end

$molecule
0 1
C          0.000000000000    0.000000000000    0.000000000000
O          0.000000000000    0.000000000000    1.131400000000
$end

@@@

$molecule
read
$end

$rem
SCF_GUESS            read
basis                def2-QZVPP
aux_basis            rimp2-def2-QZVPPD
correlation          rimp2
SCS                  3
SSS_FACTOR           272400
SOS_FACTOR           616600
SYMMETRY             FALSE
SYM_IGNORE           TRUE
gen_scfman           true
REGULARIZED_O2       2
REG_VARIABLE         2200
```

|                 |          |
|-----------------|----------|
| MEM_TOTAL       | 64000    |
| MEM_STATIC      | 2000     |
| n_frozen_core   | FC       |
| SCF_CONVERGENCE | 7        |
| THRESH          | 12       |
| MAXSCF          | 0        |
| ECP             | def2-ECP |

\$end

### References:

- (1) Brémond, E.; Adamo, C. Seeking for Parameter-Free Double-Hybrid Functionals: The PBE0-DH Model. *J. Chem. Phys.* **2011**, *135* (2), 024106. <https://doi.org/10.1063/1.3604569>.
- (2) Goerigk, L.; Grimme, S. Double-Hybrid Density Functionals. *Wiley Interdiscip. Rev. Comput. Mol. Sci.* **2014**, *4* (6), 576–600. <https://doi.org/10.1002/wcms.1193>.
- (3) Brémond, É.; Savarese, M.; Sancho-García, J. C.; Pérez-Jiménez, Á. J.; Adamo, C. Quadratic Integrand Double-Hybrid Made Spin-Component-Scaled. *J. Chem. Phys.* **2016**, *144* (12), 124104. <https://doi.org/10.1063/1.4944465>.
- (4) Sancho-García, J. C.; Brémond; Savarese, M.; Pérez-Jiménez, A. J.; Adamo, C. Partnering Dispersion Corrections with Modern Parameter-Free Double-Hybrid Density Functionals. *Phys. Chem. Chem. Phys.* **2017**, *19* (21), 13481–13487. <https://doi.org/10.1039/c7cp00709d>.
- (5) Alipour, M. Seeking for Spin-Opposite-Scaled Double-Hybrid Models Free of Fitted Parameters. *J. Phys. Chem. A* **2016**, *120* (20), 3726–3730. <https://doi.org/10.1021/acs.jpca.6b03406>.
- (6) Mehta, N.; Casanova-Páez, M.; Goerigk, L. Semi-Empirical or Non-Empirical Double-Hybrid Density Functionals: Which Are More Robust? *Phys. Chem. Chem. Phys.* **2018**, *20* (36), 23175–23194. <https://doi.org/10.1039/C8CP03852J>.
